# Supplementary material for: NaHBEt3-catalyzed HBpin hydroboration and deoxygenation of primary, secondary, and tertiary amides
Source: Royal Society of Chemistry journal article supplement (doi:10.1039/d2nj05849a), 2023-01-01
Supplement: d2nj05849a1.pdf [file d2nj05849a1.pdf]

## Supporting Information

### The Hydroboration of Deoxygenation of Primary, Secondary, Tertiary Amides and HBpin Catalyzed by NaHBET<sub>3</sub>

Ben Yan,<sup>†</sup> Xiaoli Ma,<sup>\*,†</sup> Ziyuan Pang<sup>†</sup> and Zhi Yang,<sup>\*,†</sup>

<sup>†</sup>School of Chemistry and Chemical Engineering, Beijing Institute of Technology,  
Beijing 100081, P. R. China

### Table of Contents

|                                                                                                                     |    |
|---------------------------------------------------------------------------------------------------------------------|----|
| General Information.....                                                                                            | 2  |
| General Procedure for Hydroboration of Primary Amides.....                                                          | 2  |
| General Procedure for Hydroboration of Secondary Amides.....                                                        | 4  |
| General Procedure for Hydroboration of Tertiary Amides.....                                                         | 6  |
| Control experiments for the mechanistic investigation.....                                                          | 7  |
| a) Detection of molecular hydrogen in hydroboration of benzamide.....                                               | 7  |
| b) Isolation and characterization of intermediate PhCON(Bpin) <sub>2</sub> .....                                    | 8  |
| c) In situ NMR study to characterize the interaction between PhCON(Bpin) <sub>2</sub> and NaHBET <sub>3</sub> ..... | 10 |
| d) Characterization of in situ generated intermediate imine.....                                                    | 11 |
| e) Preparation of <i>N,N</i> -diborylated amine upon hydroborylation of benzamide.....                              | 12 |
| f) In situ NMR study to characterize the interaction between HBpin and NaHBET <sub>3</sub> .....                    | 13 |
| g) The study the effect of BH <sub>3</sub> on the hydroboration reaction of amide.....                              | 14 |
| <sup>1</sup> H, and <sup>13</sup> C Spectra of Hydroboration Products of Primary Amides.....                        | 15 |
| <sup>1</sup> H, and <sup>13</sup> C Spectra of Hydroboration Products of Secondary Amides.....                      | 31 |
| <sup>1</sup> H, and <sup>13</sup> C Spectra of Hydroboration Products of Tertiary Amides.....                       | 39 |
| References.....                                                                                                     | 42 |

## General Information.

All operations during the experiment were performed in a pure N<sub>2</sub> atmosphere using Schlenk techniques or inside a Mbraun MB 150-GI glove box. Commercially available chemicals were purchased from J&K chemical reagents company or Aldrich reagents company, and stored and used according to the instructions. The NMR spectra were provided using the Bruker Ascend II 400 spectrometer.

## General Procedure for Hydroboration of Primary Amides.

In a 10 ml Schlenk flask equipped with a magnetic stir bar in the glovebox, primary amide (0.5 mmol), pinacolborane (2.2 mmol, 4.4 eq) and NaHBEt<sub>3</sub> (0.025 mmol) were combined and heated in an oil bath at 60 °C for 12 h. The reaction mixture was hydrolyzed with 1 M HCl in ether (10 mL). The volatiles were removed under reduced pressure, and the residue was washed with ethyl acetate (3 × 5 mL) to give a pure desired product as an ammonium salt. The <sup>1</sup>H NMR and <sup>13</sup>C NMR spectra of the isolated ammonium salts were recorded in D<sub>2</sub>O.

### 2a

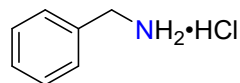

<sup>1</sup>H NMR (400 MHz, D<sub>2</sub>O): δ 7.31 (s, 5H, -CH<sub>2</sub>Ph), 4.03 (s, 2H, -CH<sub>2</sub>Ph). <sup>13</sup>C NMR (101 MHz, D<sub>2</sub>O): δ 132.62, 129.23, 128.81, 43.15.

### 2b

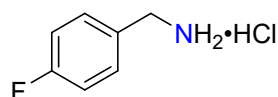

<sup>1</sup>H NMR (400 MHz, D<sub>2</sub>O): δ 7.42 (s, 2H, -CH<sub>2</sub>PhF), 7.15 (s, 2H, -CH<sub>2</sub>PhF), 4.12 (s, 2H, -CH<sub>2</sub>PhF). <sup>13</sup>C NMR (101 MHz, D<sub>2</sub>O): δ 164.09, 161.65, 131.00, 128.81, 115.88, 42.51.

### 2c

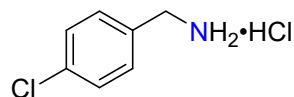

<sup>1</sup>H NMR (400 MHz, D<sub>2</sub>O): δ 7.44 (d, *J* = 7.8 Hz, 2H, -CH<sub>2</sub>PhCl), 7.39 (d, *J* = 8.1 Hz, 2H, -CH<sub>2</sub>PhCl), 4.14 (s, 2H, -CH<sub>2</sub>PhCl). <sup>13</sup>C NMR (101 MHz, D<sub>2</sub>O): δ 134.56, 131.23, 130.49, 129.21, 42.50.

### 2d

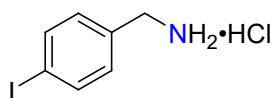

$^1\text{H}$  NMR (400 MHz,  $\text{D}_2\text{O}$ ):  $\delta$  7.79 (d,  $J = 7.9$  Hz, 2H,  $-\text{CH}_2\text{PhI}$ ), 7.17 (d,  $J = 8.0$  Hz, 2H,  $-\text{CH}_2\text{PhI}$ ), 4.09 (s, 2H,  $-\text{CH}_2\text{PhI}$ ).  $^{13}\text{C}$  NMR (101 MHz,  $\text{D}_2\text{O}$ ):  $\delta$  138.26, 132.28, 130.72, 94.65, 42.66.

**2e**

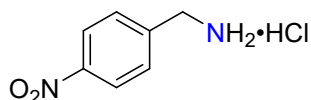

$^1\text{H}$  NMR (400 MHz,  $\text{D}_2\text{O}$ ):  $\delta$  8.25 (d,  $J = 8.6$  Hz, 2H,  $-\text{CH}_2\text{PhNO}_2$ ), 7.64 (d,  $J = 8.6$  Hz, 2H,  $-\text{CH}_2\text{PhNO}_2$ ), 4.31 (s, 2H,  $-\text{CH}_2\text{PhNO}_2$ ).  $^{13}\text{C}$  NMR (101 MHz,  $\text{D}_2\text{O}$ ):  $\delta$  147.96, 139.89, 129.85, 124.27, 42.33.

**2f**

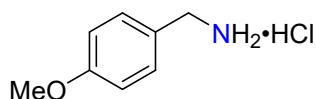

$^1\text{H}$  NMR (400 MHz,  $\text{D}_2\text{O}$ ):  $\delta$  7.35 (d,  $J = 7.2$  Hz, 2H,  $-\text{CH}_2\text{PhOMe}$ ), 6.99 (d,  $J = 7.1$  Hz, 2H,  $-\text{CH}_2\text{PhOMe}$ ), 4.07 (s, 2H,  $-\text{CH}_2\text{PhOMe}$ ), 3.78 (s, 3H,  $-\text{CH}_2\text{PhOMe}$ ).  $^{13}\text{C}$  NMR (101 MHz,  $\text{D}_2\text{O}$ ):  $\delta$  159.42, 130.58, 125.23, 114.60, 55.44, 42.64.

**2g**

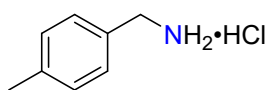

$^1\text{H}$  NMR (400 MHz,  $\text{D}_2\text{O}$ ):  $\delta$  7.28 (d,  $J = 8.5$  Hz, 4H,  $-\text{CH}_2\text{PhMe}$ ), 4.09 (s, 2H,  $-\text{CH}_2\text{PhMe}$ ), 2.30 (s, 3H,  $-\text{CH}_2\text{PhMe}$ ).  $^{13}\text{C}$  NMR (101 MHz,  $\text{D}_2\text{O}$ ):  $\delta$  139.63, 129.77, 128.88, 42.90, 20.27.

**2h**

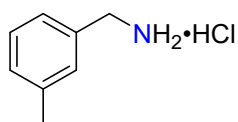

$^1\text{H}$  NMR (400 MHz,  $\text{D}_2\text{O}$ ):  $\delta$  7.34 (t,  $J = 7.3$  Hz, 1H,  $-\text{CH}_2\text{PhMe}$ ), 7.29-7.15 (m, 3H,  $-\text{CH}_2\text{PhMe}$ ), 4.10 (s, 2H,  $-\text{CH}_2\text{PhMe}$ ), 2.33 (s, 3H,  $-\text{CH}_2\text{PhMe}$ ).  $^{13}\text{C}$  NMR (101 MHz,  $\text{D}_2\text{O}$ ):  $\delta$  139.50, 132.86, 129.79, 129.34, 129.18, 125.69, 43.13, 20.38.

**2i**

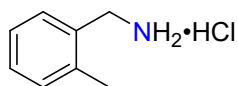

$^1\text{H}$  NMR (400 MHz,  $\text{D}_2\text{O}$ ):  $\delta$  7.68-7.09 (m, 4H,  $-\text{CH}_2\text{PhMe}$ ), 4.18 (s, 2H,  $-\text{CH}_2\text{PhMe}$ ), 2.33 (s, 3H,  $-\text{CH}_2\text{PhMe}$ ).  $^{13}\text{C}$  NMR (101 MHz,  $\text{D}_2\text{O}$ ):  $\delta$  137.22, 130.97, 130.89, 129.41, 129.05, 126.66, 40.50, 18.03.

**2j**

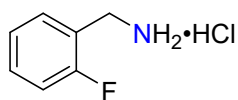

$^1\text{H NMR}$  (400 MHz,  $\text{D}_2\text{O}$ ):  $\delta$  7.46 (d,  $J = 5.6$  Hz, 2H,  $-\text{CH}_2\text{PhF}$ ), 7.24 (dd,  $J = 12.9, 8.3$  Hz, 2H,  $-\text{CH}_2\text{PhF}$ ), 4.23 (s, 2H,  $-\text{CH}_2\text{PhF}$ ).  $^{13}\text{C NMR}$  (101 MHz,  $\text{D}_2\text{O}$ ):  $\delta$  162.18, 159.74, 131.75, 131.25, 125.02, 119.51, 115.92, 37.28, 37.24.

**2k**

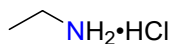

$^1\text{H NMR}$  (400 MHz,  $\text{D}_2\text{O}$ ):  $\delta$  2.88 (d,  $J = 7.3$  Hz, 2H,  $-\text{CH}_3\text{CH}_2$ ), 1.11 (t,  $J = 7.3$  Hz, 3H,  $-\text{CH}_3\text{CH}_2$ ).  $^{13}\text{C NMR}$  (101 MHz,  $\text{D}_2\text{O}$ ):  $\delta$  34.97, 11.82.

**2l**

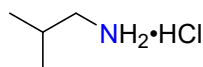

$^1\text{H NMR}$  (400 MHz,  $\text{D}_2\text{O}$ ):  $\delta$  2.81 (d,  $J = 7.1$  Hz, 2H,  $-\text{CH}_2\text{CH}(\text{CH}_3)_2$ ), 1.91 (dt,  $J = 13.7, 6.8$  Hz, 1H,  $-\text{CH}_2\text{CH}(\text{CH}_3)_2$ ), 0.95 (d,  $J = 6.7$  Hz, 6H,  $-\text{CH}_2\text{CH}(\text{CH}_3)_2$ ).  $^{13}\text{C NMR}$  (101 MHz,  $\text{D}_2\text{O}$ ):  $\delta$  46.40, 26.30, 18.86.

**2m**

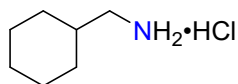

$^1\text{H NMR}$  (400 MHz,  $\text{D}_2\text{O}$ ):  $\delta$  2.81 (d,  $J = 7.0$  Hz, 2H,  $-\text{CH}_2\text{C}_6\text{H}_{11}$ ), 1.70 (d,  $J = 11.7$  Hz, 4H,  $-\text{CH}_2\text{C}_6\text{H}_{11}$ ), 1.62 (d,  $J = 10.5$  Hz, 2H,  $-\text{CH}_2\text{C}_6\text{H}_{11}$ ), 1.18 (dt,  $J = 24.1, 12.4$  Hz, 3H,  $-\text{CH}_2\text{C}_6\text{H}_{11}$ ), 0.97 (t,  $J = 10.7$  Hz, 2H,  $-\text{CH}_2\text{C}_6\text{H}_{11}$ ).  $^{13}\text{C NMR}$  (101 MHz,  $\text{D}_2\text{O}$ ):  $\delta$  45.21, 35.40, 29.63, 25.58, 25.03.

**2n**

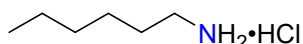

$^1\text{H NMR}$  (400 MHz,  $\text{D}_2\text{O}$ ):  $\delta$  3.20-2.73 (m, 2H,  $-\text{CH}_2(\text{CH}_2)_3\text{CH}_2\text{CH}_3$ ), 1.87-1.47 (m, 2H,  $-\text{CH}_2(\text{CH}_2)_3\text{CH}_2\text{CH}_3$ ), 1.40-1.16 (m, 6H,  $-\text{CH}_2(\text{CH}_2)_3\text{CH}_2\text{CH}_3$ ), 0.86 (t,  $J = 6.9$  Hz, 3H,  $-\text{CH}_2(\text{CH}_2)_3\text{CH}_2\text{CH}_3$ ).  $^{13}\text{C NMR}$  (101 MHz,  $\text{D}_2\text{O}$ ):  $\delta$  39.64, 30.48, 26.70, 25.26, 21.79, 13.32.

**2o**

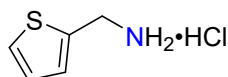

$^1\text{H NMR}$  (400 MHz,  $\text{D}_2\text{O}$ ):  $\delta$  7.47 (d,  $J = 5.1$  Hz, 1H,  $-\text{CH}_2\text{C}_4\text{SH}_3$ ), 7.20 (d,  $J = 3.3$  Hz, 1H,  $-\text{CH}_2\text{C}_4\text{SH}_3$ ), 7.10-7.03 (m, 1H,  $-\text{CH}_2\text{C}_4\text{SH}_3$ ), 4.35 (s, 2H,  $-\text{CH}_2\text{C}_4\text{SH}_3$ ).  $^{13}\text{C NMR}$  (101 MHz,  $\text{D}_2\text{O}$ ):  $\delta$  134.08, 129.49, 127.95, 127.78, 37.50.

## General Procedure for Hydroboration of Secondary Amides.

In a 10 ml Schlenk flask equipped with a magnetic stir bar in the glovebox, secondary amide (0.5 mmol), pinacolborane (1.5mmol, 3.0 eq) and NaHBET<sub>3</sub> (0.025 mmol) were combined and heated in an oil bath at 60 °C for 12 h. The reaction mixture was hydrolyzed with 1 M HCl in ether (10 mL). The volatiles were removed under reduced pressure, and the residue was washed with ethyl acetate (3 × 5 mL) to give a pure desired product as an ammonium salt. The <sup>1</sup>H NMR and <sup>13</sup>C NMR spectra of the isolated ammonium salts were recorded in D<sub>2</sub>O.

**4a**

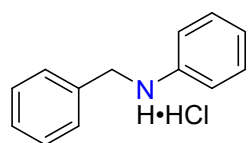

<sup>1</sup>H NMR (400 MHz, D<sub>2</sub>O): δ 7.51-7.45 (m, 3H, *Ph*), 7.43-7.34 (m, 3H, *Ph*), 7.31-7.24 (m, 4H, *Ph*), 4.58 (s, 2H, -CH<sub>2</sub>). <sup>13</sup>C NMR (101 MHz, D<sub>2</sub>O): δ 133.86, 130.41, 130.22, 129.94, 129.82, 129.11, 123.00, 55.59.

**4b**

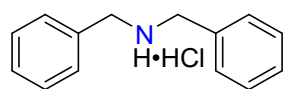

<sup>1</sup>H NMR (400 MHz, D<sub>2</sub>O): δ 7.55-7.26 (m, 10H, *Ph*), 4.22 (s, 4H, CH<sub>2</sub>). <sup>13</sup>C NMR (101 MHz, D<sub>2</sub>O): δ 130.83, 129.87, 129.68, 129.32, 50.59.

**4c**

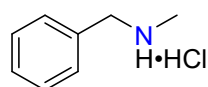

<sup>1</sup>H NMR (400 MHz, D<sub>2</sub>O): δ 7.42 (s, 5H, *Ph*), 4.15 (s, 2H, CH<sub>2</sub>), 2.66 (s, 3H, CH<sub>3</sub>). <sup>13</sup>C NMR (101 MHz, D<sub>2</sub>O): δ 130.70, 129.71, 129.68, 129.27, 52.38, 32.06.

**4d**

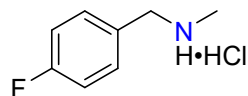

<sup>1</sup>H NMR (400 MHz, D<sub>2</sub>O): δ 7.45 (dd, *J* = 8.2, 5.4 Hz, 2H, *Ph*), 7.18 (t, *J* = 8.8 Hz, 2H, *Ph*), 4.16 (s, 2H, CH<sub>2</sub>), 2.68 (s, 3H, CH<sub>3</sub>). <sup>13</sup>C NMR (101 MHz, D<sub>2</sub>O): δ 164.41, 161.97, 132.03, 131.95, 126.82, 116.21, 115.99, 51.65, 32.06.

**4e**

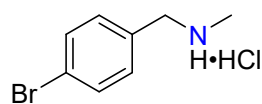

$^1\text{H NMR}$  (400 MHz,  $\text{D}_2\text{O}$ ):  $\delta$  7.60 (d,  $J = 8.3$  Hz, 2H, *Ph*), 7.33 (d,  $J = 8.3$  Hz, 2H, *Ph*), 4.14 (s, 2H,  $\text{CH}_2$ ), 2.67 (s, 3H,  $\text{CH}_3$ ).  $^{13}\text{C NMR}$  (101 MHz,  $\text{D}_2\text{O}$ ):  $\delta$  132.28, 131.60, 130.02, 123.31, 51.74, 32.22.

**4f**

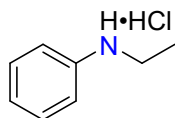

$^1\text{H NMR}$  (400 MHz,  $\text{D}_2\text{O}$ ):  $\delta$  7.53 (d,  $J = 7.6$  Hz, 3H, *Ph*), 7.42 (d,  $J = 6.9$  Hz, 2H, *Ph*), 3.43 (q,  $J = 7.3$  Hz, 2H,  $\text{CH}_2$ ), 1.26 (t,  $J = 7.3$  Hz, 3H,  $\text{CH}_3$ ).  $^{13}\text{C NMR}$  (101 MHz,  $\text{D}_2\text{O}$ ):  $\delta$  134.38, 130.36, 129.92, 122.56, 47.33, 10.26.

**4g**

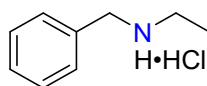

$^1\text{H NMR}$  (400 MHz,  $\text{D}_2\text{O}$ ):  $\delta$  7.55 (s, 5H, *Ph*), 4.27 (s, 2H,  $\text{CH}_2$ ), 3.19 (q,  $J = 7.3$  Hz, 2H,  $\text{CH}_2$ ), 1.36 (t,  $J = 7.3$  Hz, 3H,  $\text{CH}_3$ ).  $^{13}\text{C NMR}$  (101 MHz,  $\text{D}_2\text{O}$ ):  $\delta$  131.06, 129.70, 129.60, 129.29, 50.66, 42.49, 10.55.

**4h**

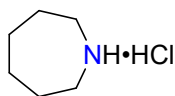

$^1\text{H NMR}$  (400 MHz,  $\text{D}_2\text{O}$ ):  $\delta$  3.30-3.13 (m, 2H,  $-\text{NC}_6\text{H}_{10}$ ), 1.81 (s, 2H,  $-\text{NC}_6\text{H}_{10}$ ), 1.64 (s, 2H,  $-\text{NC}_6\text{H}_{10}$ ).  $^{13}\text{C NMR}$  (101 MHz,  $\text{D}_2\text{O}$ )  $\delta$  45.21, 35.40, 29.63, 25.58, 25.03.

### General Procedure for Hydroboration of Tertiary Amides.

In a 10 ml Schlenk flask equipped with a magnetic stir bar in the glovebox, tertiary amide (0.5 mmol), pinacolborane (1.5 mmol, 3.0 eq) and  $\text{NaHBET}_3$  (0.025 mmol) were combined and heated in an oil bath at 60 °C for 12 h. The reaction mixture was hydrolyzed with 1 M HCl in ether (10 mL). The volatiles were removed under reduced pressure, and the residue was washed with ethyl acetate ( $3 \times 5$  mL) to give a pure desired product as an ammonium salt. The  $^1\text{H NMR}$  and  $^{13}\text{C NMR}$  spectra of the isolated ammonium salts were recorded in  $\text{D}_2\text{O}$ .

**6a**

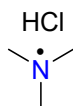

$^1\text{H NMR}$  (400 MHz,  $\text{D}_2\text{O}$ ):  $\delta$  2.74 (s, 9H,  $\text{CH}_3$ ).  $^{13}\text{C NMR}$  (101 MHz,  $\text{D}_2\text{O}$ ):  $\delta$  44.78.

**6b**

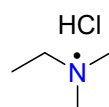

$^1\text{H}$  NMR (400 MHz,  $\text{D}_2\text{O}$ ):  $\delta$  2.25 (d,  $J = 7.3$  Hz, 2H,  $\text{CH}_2$ ), 2.06 (s, 6H,  $\text{CH}_3$ ), 0.91 (t,  $J = 7.3$  Hz, 3H,  $\text{CH}_3$ ).  $^{13}\text{C}$  NMR (101 MHz,  $\text{D}_2\text{O}$ ):  $\delta$  52.30, 43.23, 11.36.

**6c**

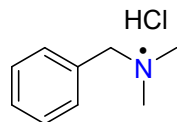

$^1\text{H}$  NMR (400 MHz,  $\text{D}_2\text{O}$ ):  $\delta$  7.47-7.17 (m, 5H,  $\text{Ph}$ ), 3.43 (s, 2H,  $\text{CH}_2$ ), 2.12 (s, 6H,  $\text{CH}_2$ ).  $^{13}\text{C}$  NMR (101 MHz,  $\text{D}_2\text{O}$ ):  $\delta$  137.45, 129.92, 128.47, 127.61, 62.75, 43.59.

### Control experiments for the mechanistic investigation.

To understand the mechanism associated with hydroboration of primary amide, we have carried out a series of experimental studies as mentioned below.

#### a) Detection of molecular hydrogen in hydroboration of benzamide.

In a glovebox, an oven dried screw-cap NMR tube was charged with benzamide (12.10 mg, 0.10 mmol, 1.0 equivalent), HBpin (25.56 mg, 0.20 mmol, 2.0 equivalent), and  $\text{CDCl}_3$  (500  $\mu\text{L}$ ) and reacted at room temperature for 30 min.  $\text{H}_2$  production was observed and subsequently characterized by  $^1\text{H}$  NMR spectroscopy. A sharp resonance at  $\delta$  4.46 ppm in  $^1\text{H}$  NMR spectrum indicates the formation of molecular hydrogen (**Scheme S1** and Figure S1).

**Scheme S1.** Detection of molecular hydrogen in hydroboration of benzamide.

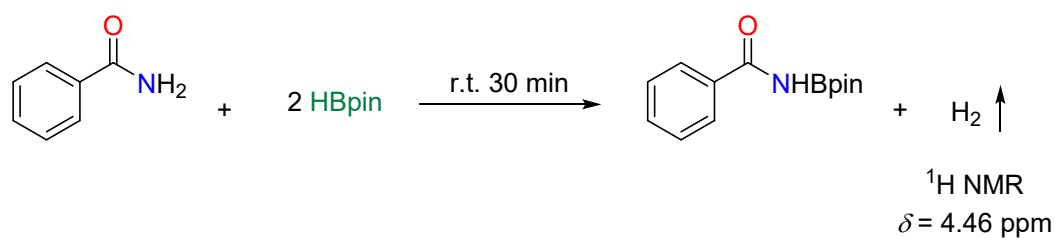

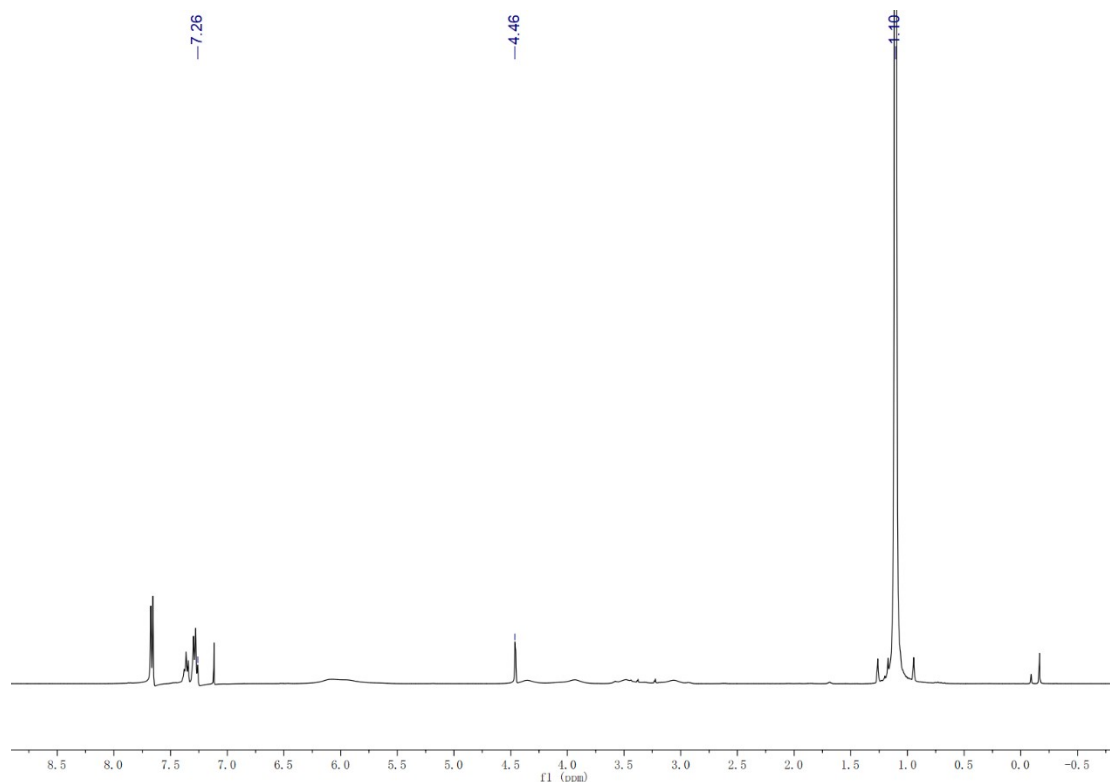

Figure S1.  $^1\text{H}$  NMR spectrum of molecular hydrogen recorded in  $\text{CDCl}_3$  for hydroboration of benzamide.

**b) Isolation and characterization of intermediate  $\text{PhCON}(\text{Bpin})_2$**

In a glovebox, benzamide (0.25 mmol), HBpin (0.5 mmol, 2.0 equivalent), and THF (1 mL) were added in a Schlenk flask. The reaction mixture was stirred at ambient temperature overnight. Removal of the volatiles under reduced pressure afforded a white powder, which was washed with *n*-hexane for three times. Drying up the residue gave a white solid. The borylated-amide compound  $\text{PhCON}(\text{Bpin})_2$  was isolated by recrystallization from THF/hexane, and was characterized by  $^1\text{H}$ ,  $^{13}\text{C}$ , and  $^{11}\text{B}$  NMR spectroscopy (Scheme S2 and Figures S2-S4)

**Scheme S2.** Preparation and isolation of intermediate  $\text{PhCON}(\text{Bpin})_2$

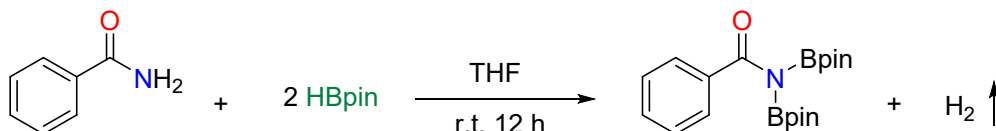



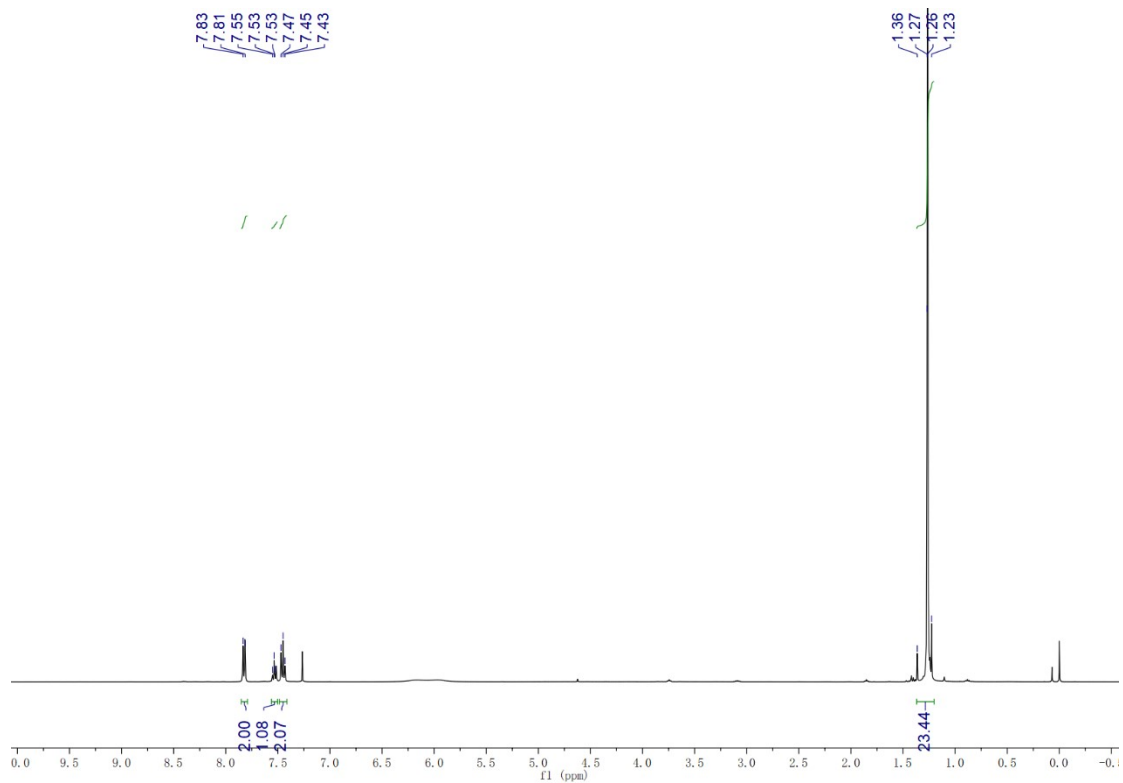

Figure S2.  $^1\text{H}$  NMR spectrum of intermediate  $\text{PhCON}(\text{Bpin})_2$

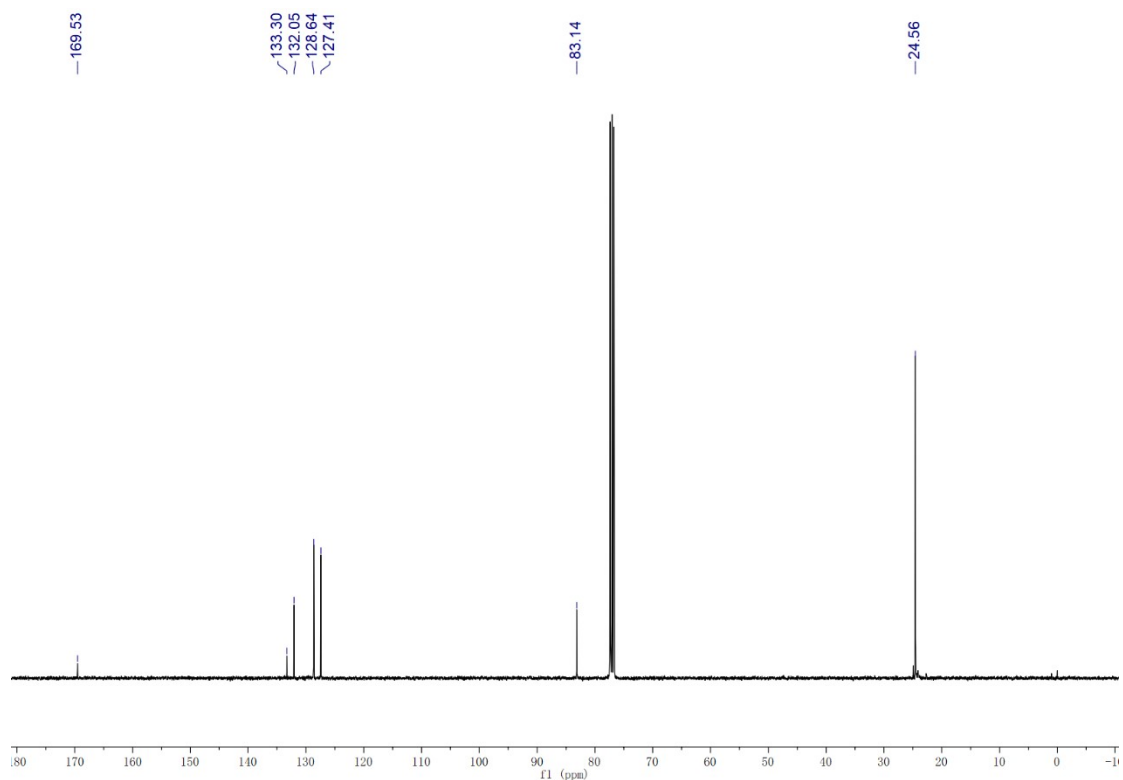

Figure S3.  $^{13}\text{C}$  NMR spectrum of intermediate  $\text{PhCON}(\text{Bpin})_2$

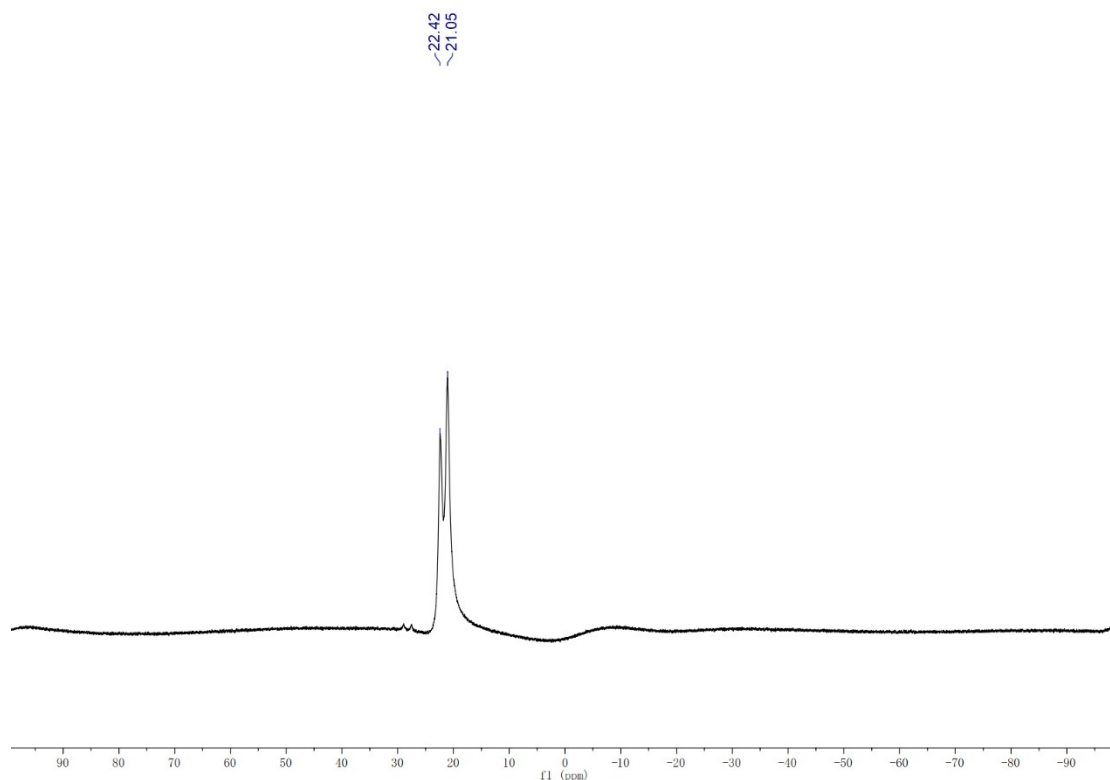

Figure S4.  $^{11}\text{B}$  NMR spectrum of intermediate  $\text{PhCON}(\text{Bpin})_2$

**c) In situ NMR study to characterize the interaction between  $\text{PhCON}(\text{Bpin})_2$  and  $\text{NaHBEt}_3$ .**

In a glovebox,  $\text{PhCON}(\text{Bpin})_2$  (0.25 mmol),  $\text{NaHBEt}_3$  (0.25 mmol, 1.0 equivalent), and  $\text{CDCl}_3$  (500  $\mu\text{L}$ ) in a Schlenk flask and reacted at room temperature for overnight. Next, the interaction between  $\text{PhCON}(\text{Bpin})_2$  and  $\text{NaHBEt}_3$  was characterized through  $^1\text{H}$  and  $^{11}\text{B}$  NMR spectroscopies. In  $^1\text{H}$  NMR spectrum,  $\sim \delta$  4.5 ppm was observed as compared to that of  $\text{PhCON}(\text{Bpin})_2$ . And in  $^{11}\text{B}$  NMR spectroscopy comparison with  $\text{PhCON}(\text{Bpin})_2$  shows several new peaks, 87.2 ppm ( $\text{BEt}_3$ )<sup>[S1]</sup>, 47.5 ppm, 3.77 ppm. These observations clearly suggest the interaction between two compounds which is consistent with result reported by Ramachandaran<sup>[S2]</sup>. And there is an interconversion of two intermediates with  $^{11}\text{B}$  NMR spectra corresponding to 47.5 ppm and 3.77 ppm, respectively (Scheme S3 and Figures S5-S6).

**Scheme S3. Preparation and isolation of intermediate  $\text{PhCON}(\text{Bpin})_2$**

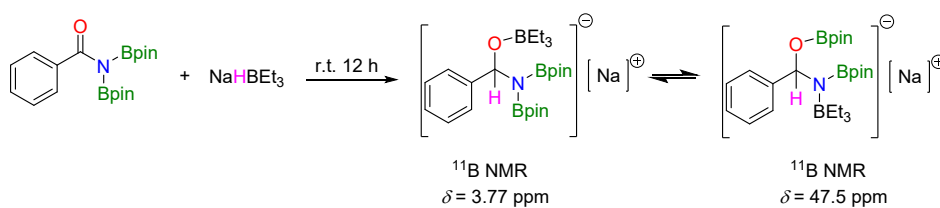

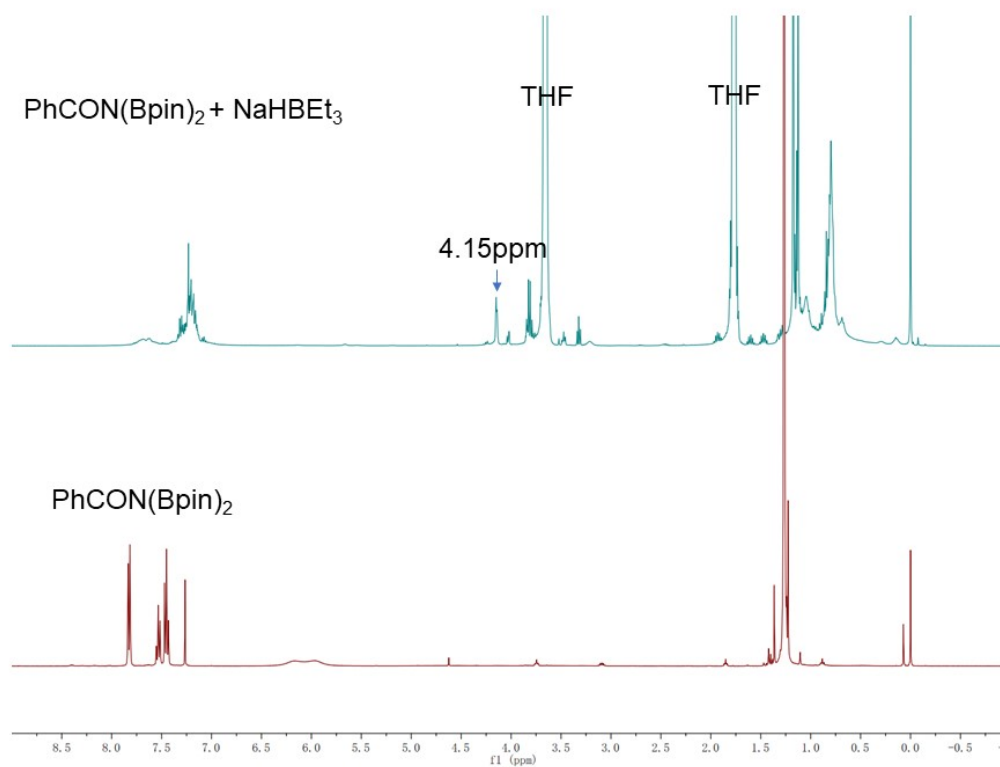

Figure S5. <sup>1</sup>H NMR spectrum of the reaction of PhCON(Bpin)<sub>2</sub> and NaHBET<sub>3</sub>

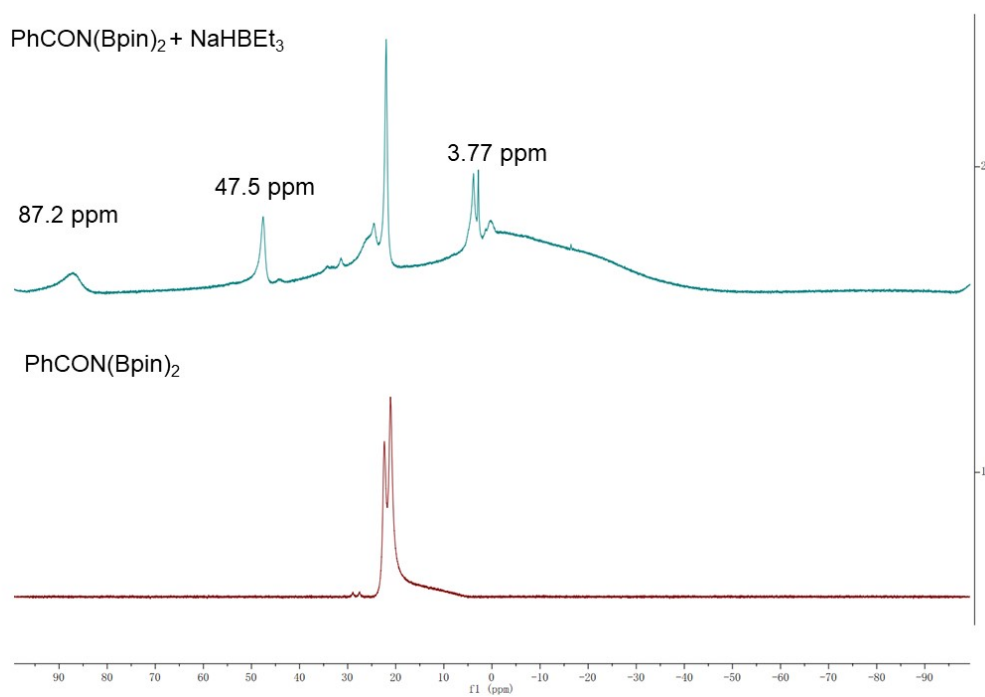

Figure S6. <sup>11</sup>B NMR spectrum of the reaction of PhCON(Bpin)<sub>2</sub> and NaHBET<sub>3</sub>

**d) Characterization of in situ generated intermediate imine.**

In a glovebox, benzamide (0.25 mmol), HBpin (1.0 mmol, 4.0 equivalent) and NaHBEt<sub>3</sub> (0.0125 mmol) in a Schlenk flask and reacted at 60 °C for 4 hours. Next, all volatiles were removed using high vacuum and <sup>1</sup>H NMR spectroscopy of the reaction mixture was recorded in CDCl<sub>3</sub>. A sharp resonance at δ 10.21 ppm for benzamide was observed in <sup>1</sup>H NMR spectrum, which clearly indicates the formation of an imine intermediate (Scheme S4 and Figure S7).

**Scheme S4.** Synthetic scheme for the formation of intermediate imine.

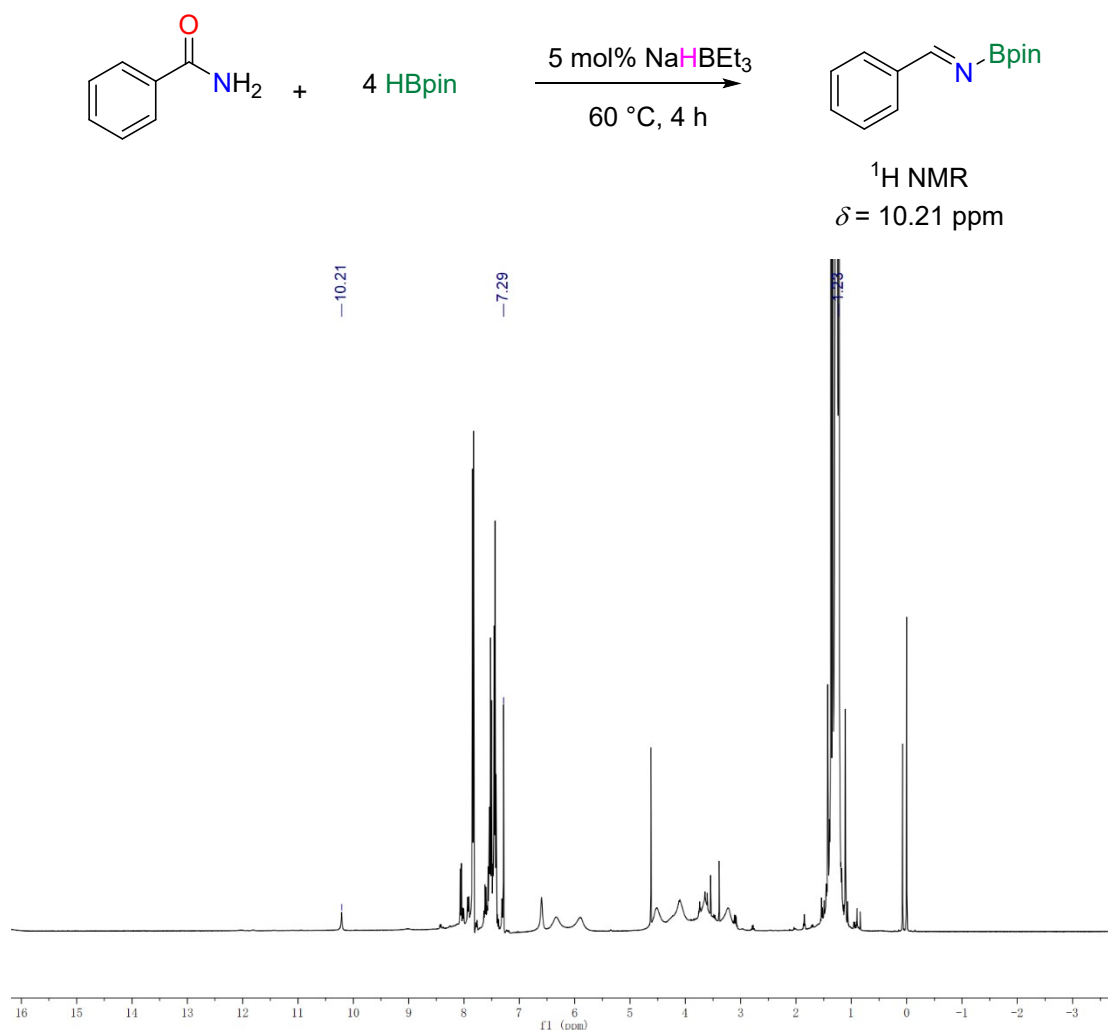

Figure S7. <sup>1</sup>H NMR spectrum of in situ generated *N*-borylated imine recorded in CDCl<sub>3</sub>.

**e) Preparation of *N,N*-diborylated amine upon hydroborylation of benzamide.**

In a 10 ml Schlenk flask equipped with a magnetic stir bar in the glovebox, primary amide (0.5 mmol), pinacolborane (2.2 mmol, 4.4 eq) and NaHBEt<sub>3</sub> (0.025 mmol) were combined and heated in an oil bath at 60 °C for 12 h. After completion of the reaction <sup>1</sup>H NMR was recorded in CDCl<sub>3</sub> (Scheme S5 and Figure S8).

**Scheme S5.** Synthetic scheme for the formation of *N,N*-diborylated amine from benzamide.

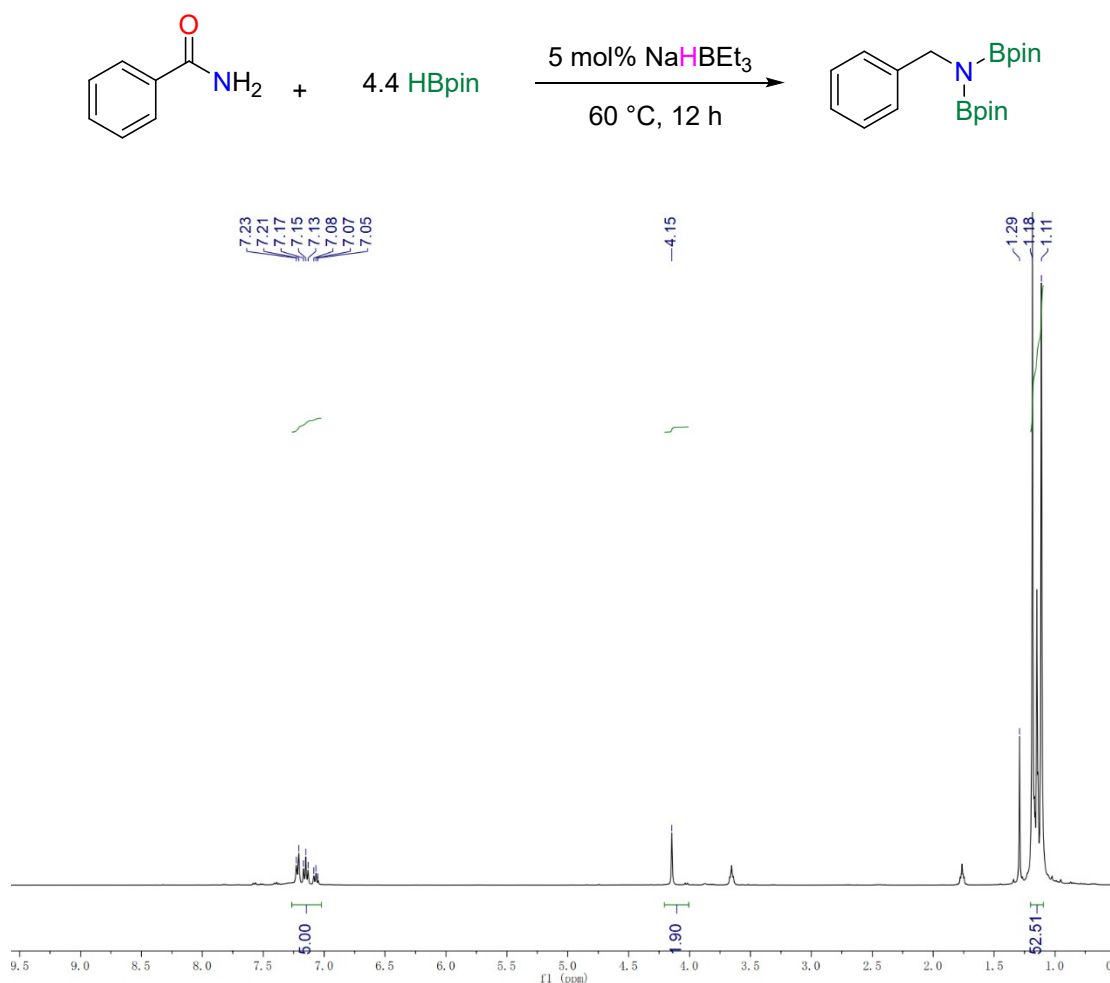

Figure S8.  $^1\text{H}$  NMR spectrum of the reaction of benzamide with HBpin catalyzed by  $\text{NaHBET}_3$ .

**f) In situ NMR study to characterize the interaction between HBpin and  $\text{NaHBET}_3$ .**

In a 10 ml Schlenk flask equipped with a magnetic stir bar in the glovebox, pinacolborane (2.2 mmol, 4.4 eq) and  $\text{NaHBET}_3$  (0.025 mmol) were combined and heated in an oil bath at  $60\text{ }^\circ\text{C}$  for 30 min. After completion of the reaction  $^{11}\text{B}$  NMR was recorded in  $\text{CDCl}_3$ , we can find that a new quadruple peak around  $\delta = -13$  ppm reveals the presence of  $\text{BH}_3$ . (Scheme S6 and Figure S9).

**Scheme S6.** The formation of  $\text{BH}_3$  from HBpin and  $\text{NaHBET}_3$ .

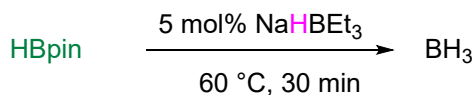

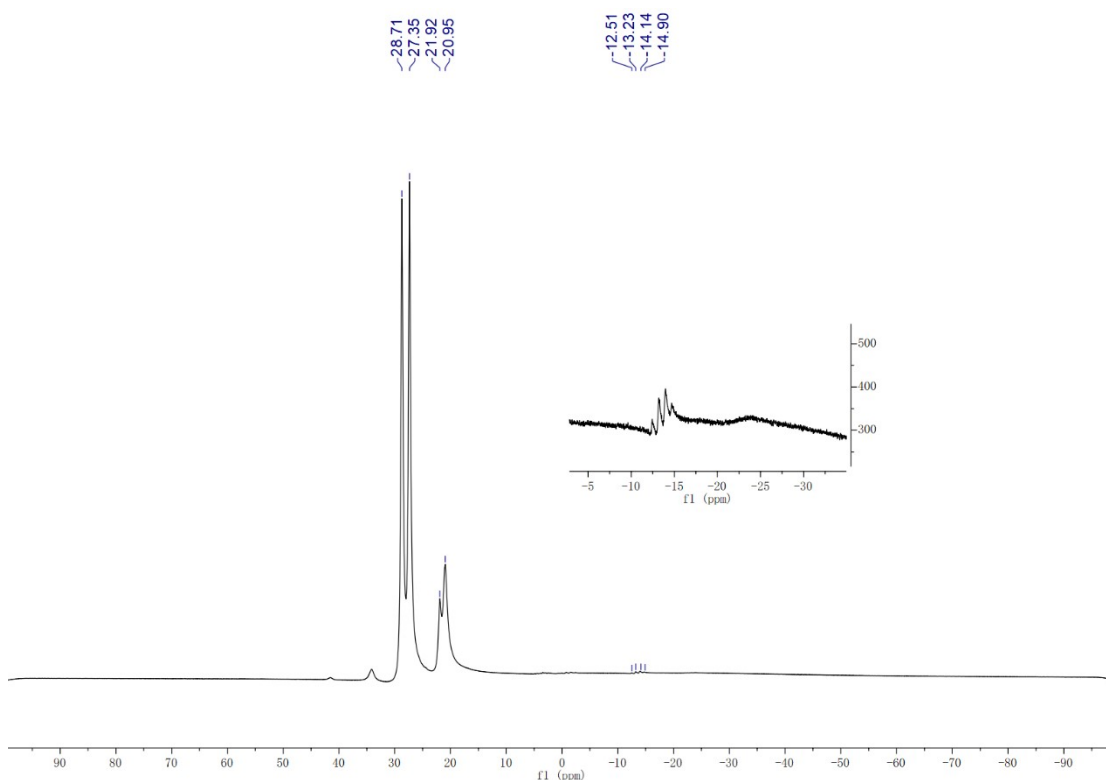

Figure S9.  $^{11}\text{B}$  NMR spectrum of the reaction of with HBpin with  $\text{NaHBET}_3$ .

**g) The study the effect of  $\text{BH}_3$  on the hydroboration reaction of amide**

In a 10 ml Schlenk flask equipped with a magnetic stir bar in the glovebox, primary amide (0.5 mmol), pinacolborane (2.2 mmol, 4.4 eq) and catalyst **X** (5 mol%) were combined and heated in an oil bath at 60 °C for 12 h. After completion of the reaction  $^1\text{H}$  NMR was recorded in  $\text{CDCl}_3$  and calculated its yield (**Scheme S7**, Figure S10 and Table 1). For the mentioned reaction, the yield of product is up to 92% in the presence of TMEDA (95% for without TMEDA). When only  $\text{BH}_3\cdot\text{SMe}_2$  as catalyst which is consistent with the amount of reaction of HBpin and  $\text{NaHBET}_3$ , we cannot find any reaction. Even if the amount of  $\text{BH}_3\cdot\text{SMe}_2$  is raised to 5%, only 7% product is obtained. We also investigated the effect of  $\text{BEt}_3$  and found that  $\text{BEt}_3$  does not act as a catalyst for this reaction. These results suggest for the noninvolvement or very less influence of  $\text{BH}_3$  and  $\text{BEt}_3$  as an active catalyst for the hydroboration of benzamide.

**Scheme S7. Synthetic scheme for the hydroboration of benzamide in presence of catalyst X.**

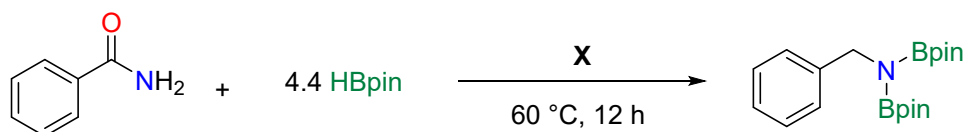

**Table1. The hydroboration reaction of benzamide with HBpin in the presence of X**

| X (5 mol%)                                     | Yield |
|------------------------------------------------|-------|
| NaHBET <sub>3</sub>                            | 95%   |
| NaHBET <sub>3</sub> + TMEDA (1:2)              | 91%   |
| BH <sub>3</sub> ·SMe <sub>2</sub> <sup>a</sup> | n.d.  |
| BH <sub>3</sub> ·SMe <sub>2</sub> <sup>b</sup> | 7%    |
| BEt <sub>3</sub>                               | n.d.  |

<sup>a</sup> 0.3 mol% BH<sub>3</sub>·SMe<sub>2</sub> which quantity is consistent with BH<sub>3</sub> that reaction of with HBpin with NaHBET<sub>3</sub>; <sup>b</sup> 5 mol% BH<sub>3</sub>·SMe<sub>2</sub>

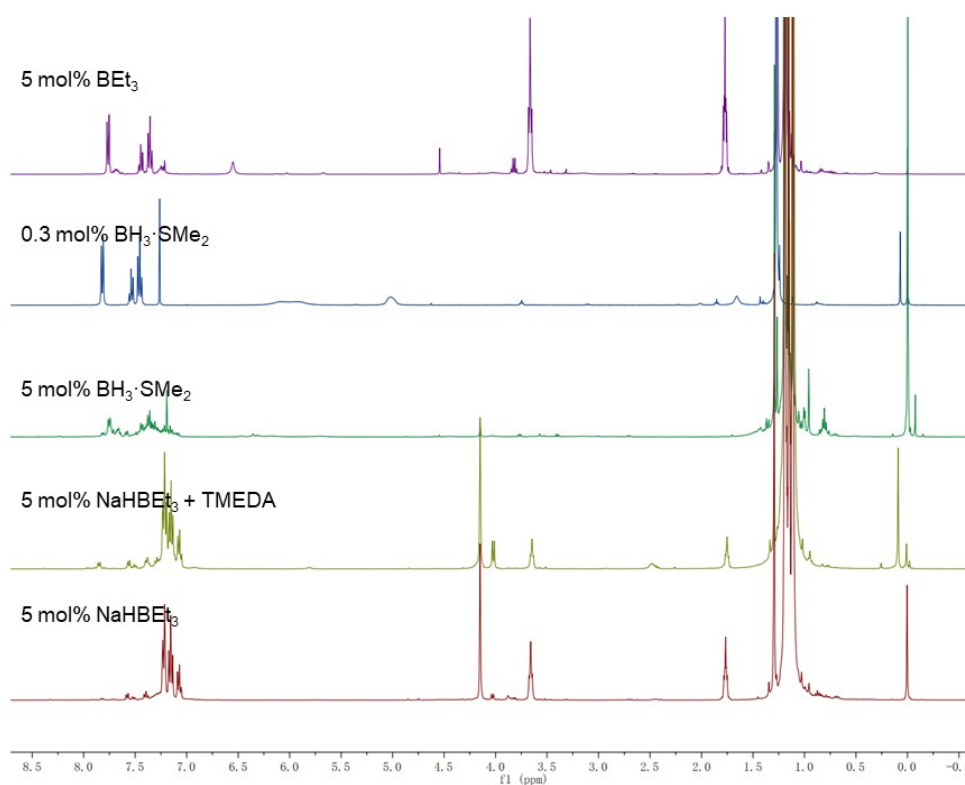

Figure S10. <sup>1</sup>H NMR spectrum of the reaction of PhCONH<sub>2</sub> and HBpin as X as a catalyst

### <sup>1</sup>H, and <sup>13</sup>C Spectra of Hydroboration Products of Primary Amides

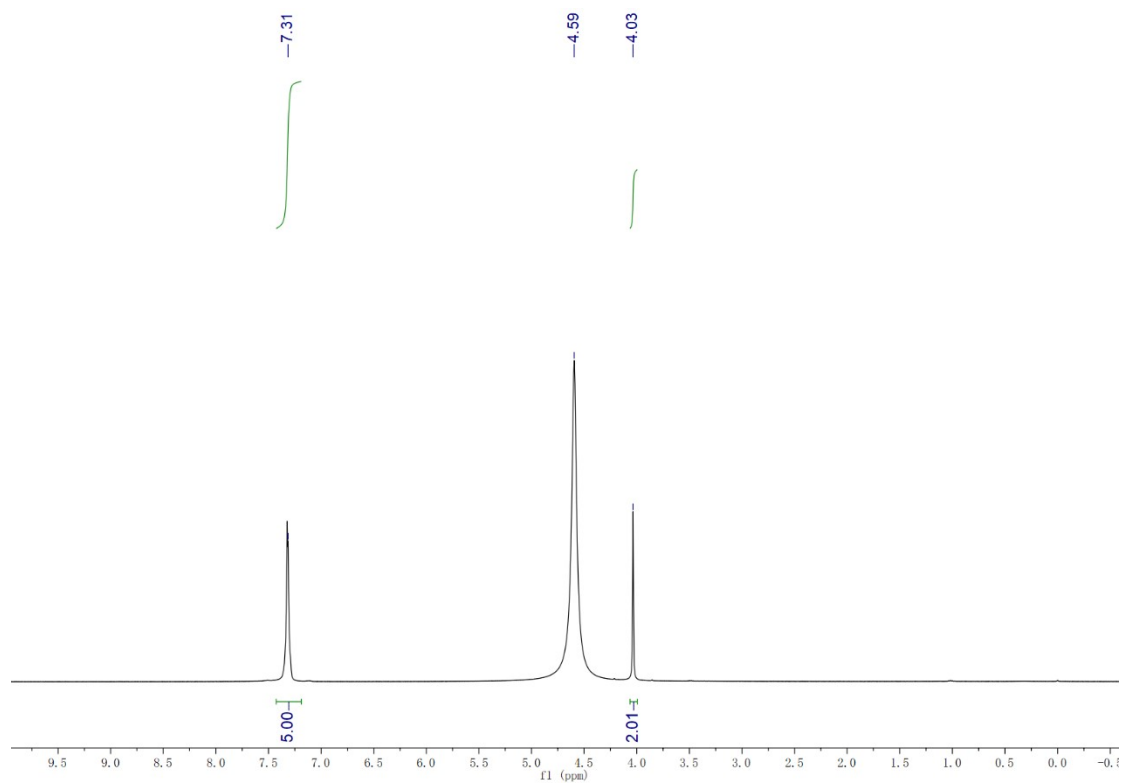

Figure S1.1.1  $^1\text{H}$  NMR of compound **2a** in  $\text{D}_2\text{O}$

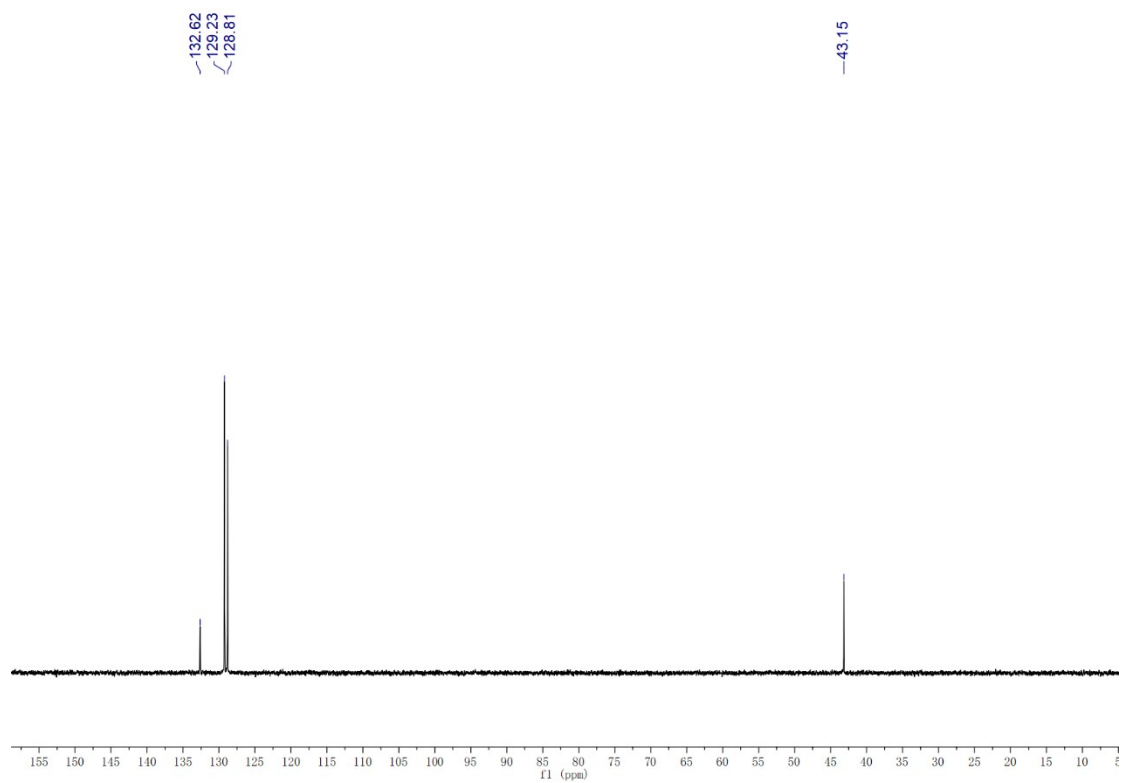

Figure S1.1.2  $^{13}\text{C}$  NMR of compound **2a** in  $\text{D}_2\text{O}$



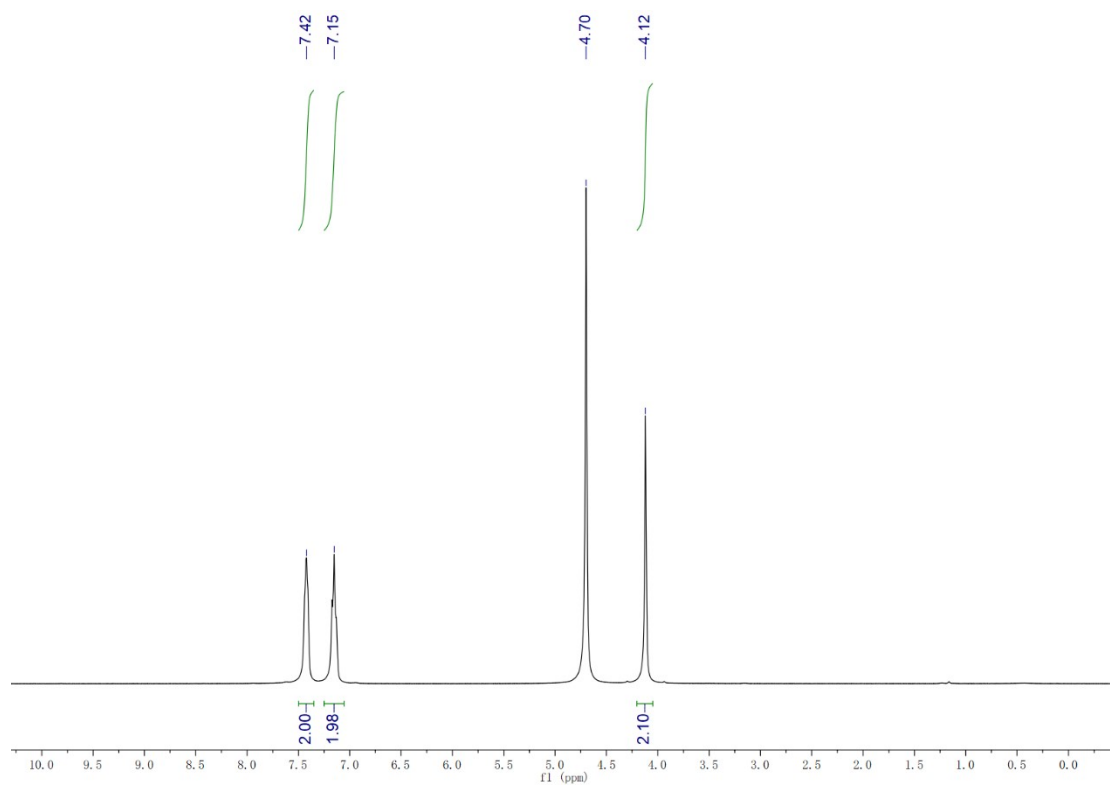

Figure S1.2.1 <sup>1</sup>H NMR of compound **2b** in D<sub>2</sub>O

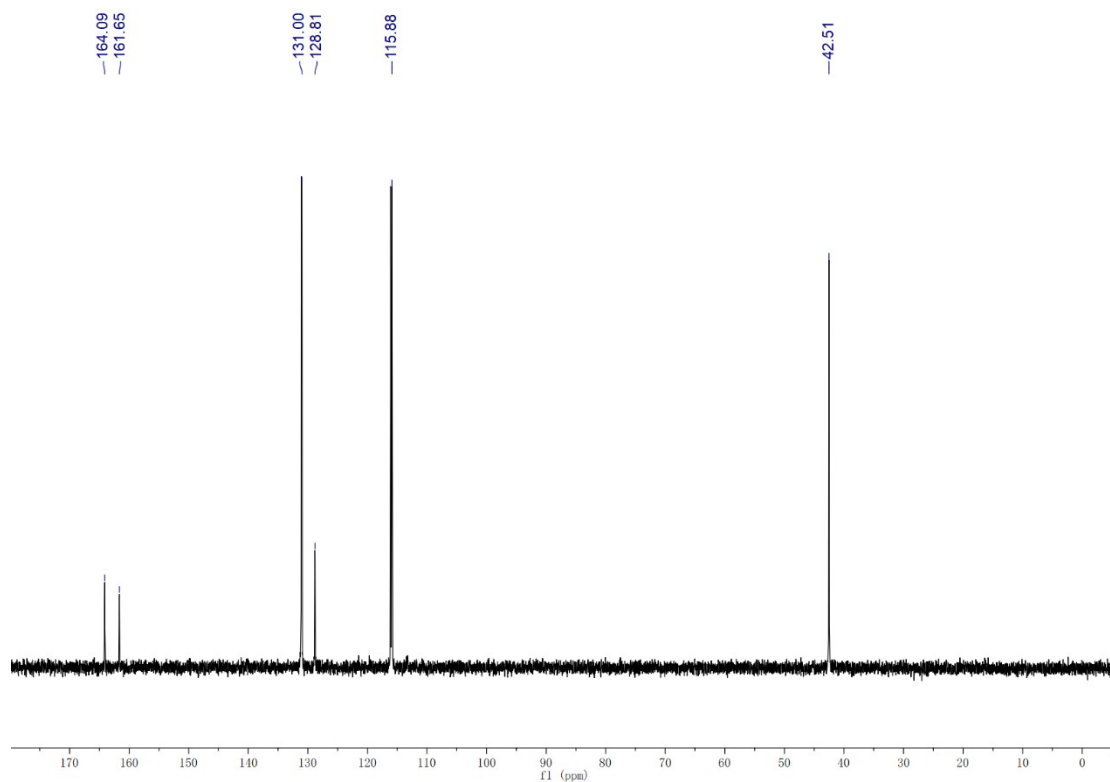

Figure S1.2.2 <sup>13</sup>C NMR of compound **2b** in D<sub>2</sub>O

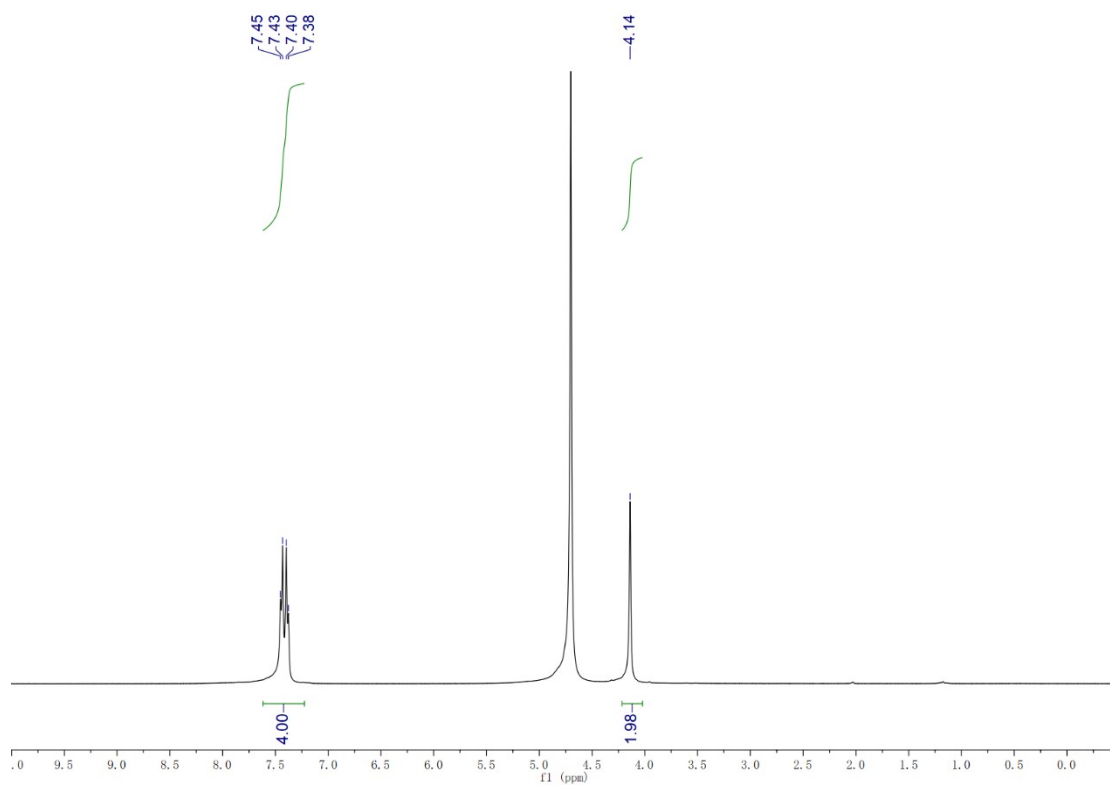

Figure S1.3.1  $^1\text{H}$  NMR of compound **2c** in  $\text{D}_2\text{O}$

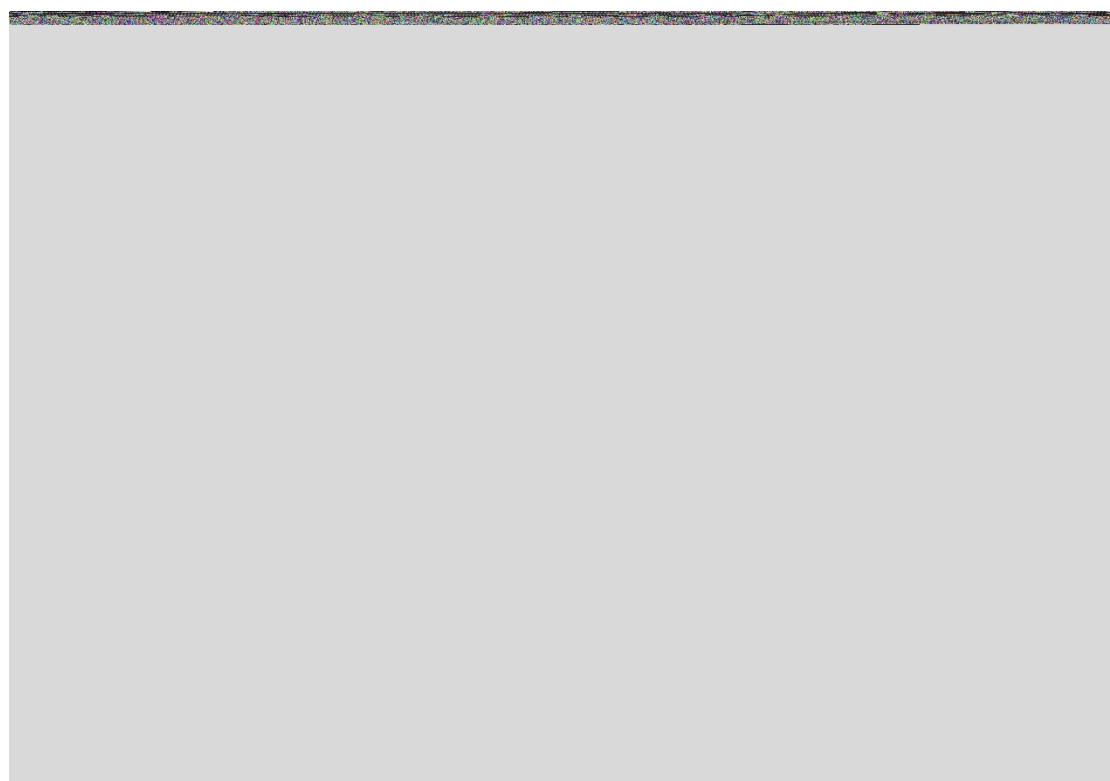

Figure S1.3.2  $^{13}\text{C}$  NMR of compound **2c** in  $\text{D}_2\text{O}$

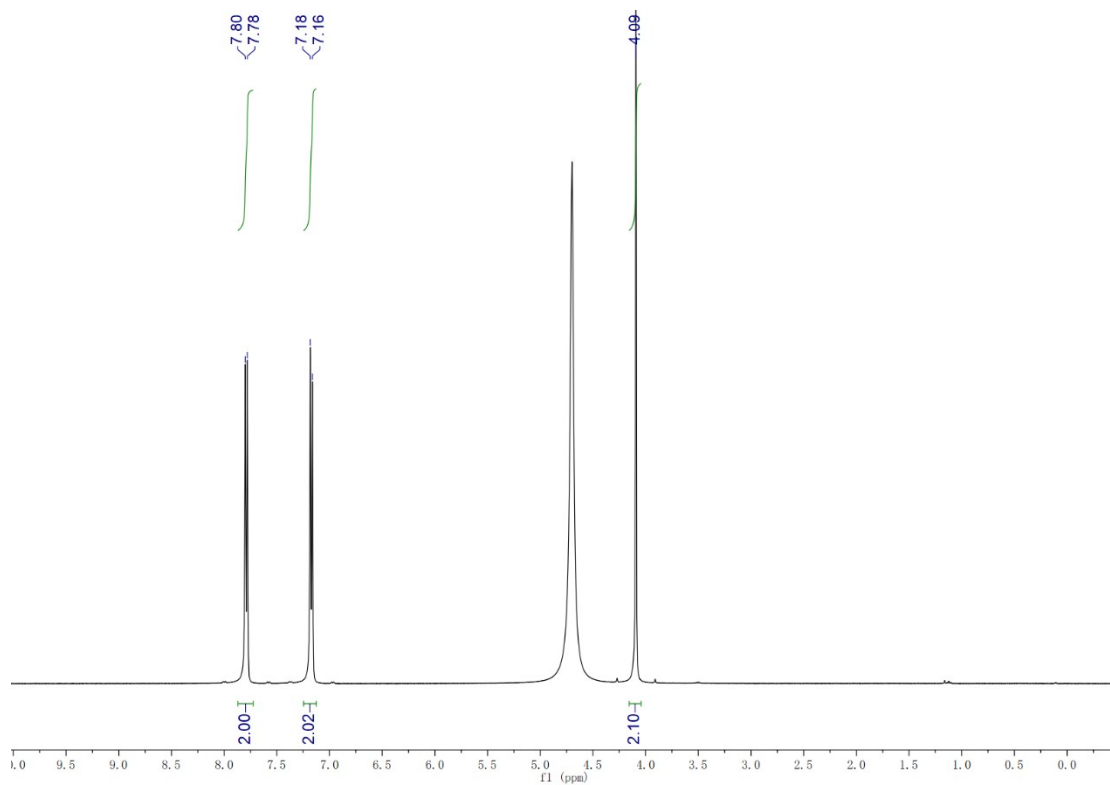

Figure S1.4.1  $^1\text{H}$  NMR of compound **2d** in  $\text{D}_2\text{O}$

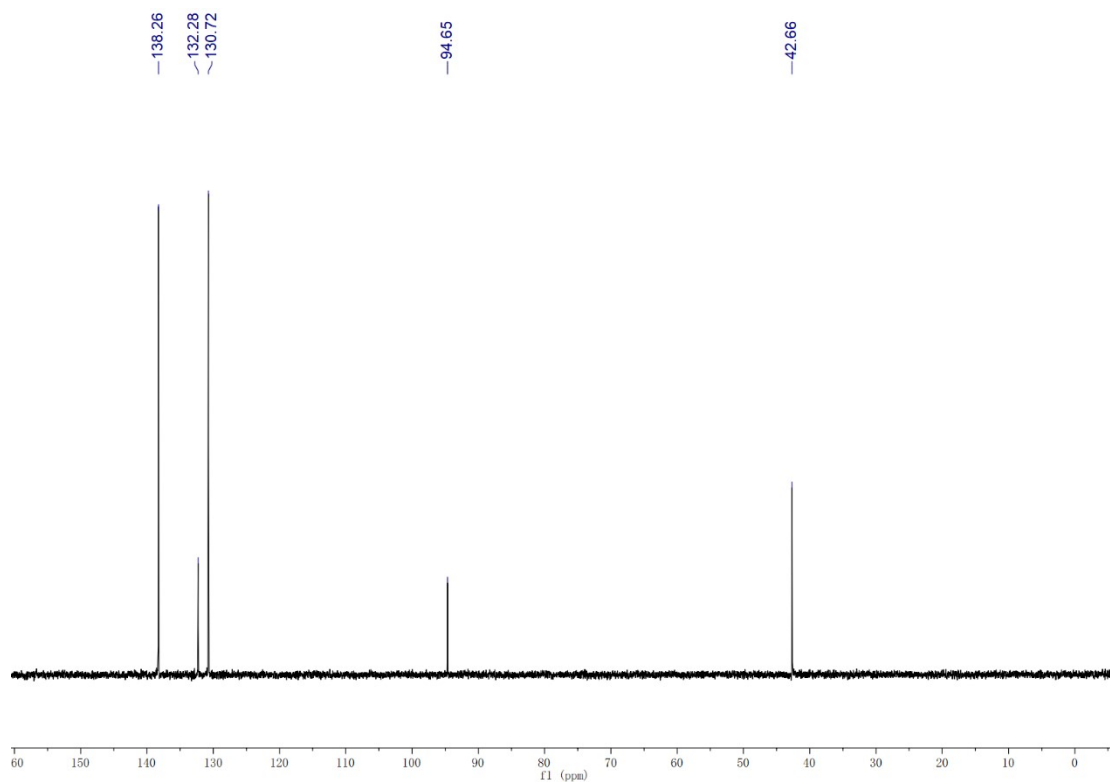

Figure S1.4.2  $^{13}\text{C}$  NMR of compound **2d** in  $\text{D}_2\text{O}$

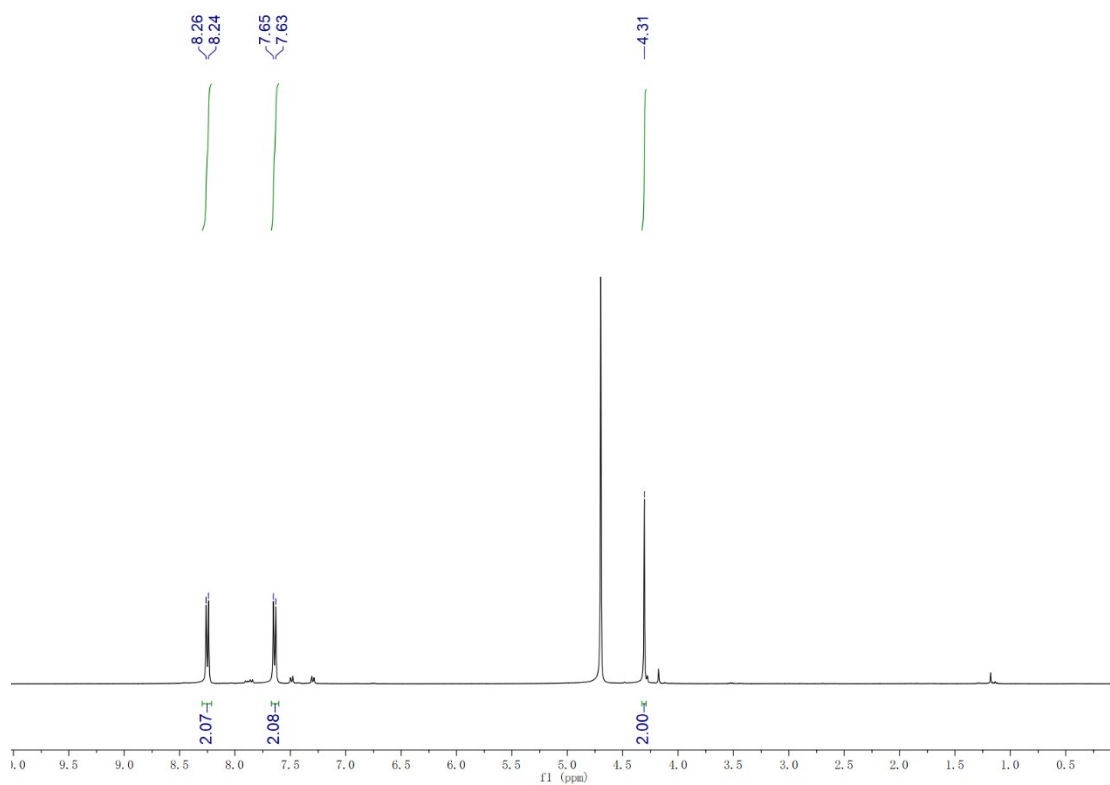

Figure S1.5.1  $^1\text{H}$  NMR of compound **2e** in in  $\text{D}_2\text{O}$

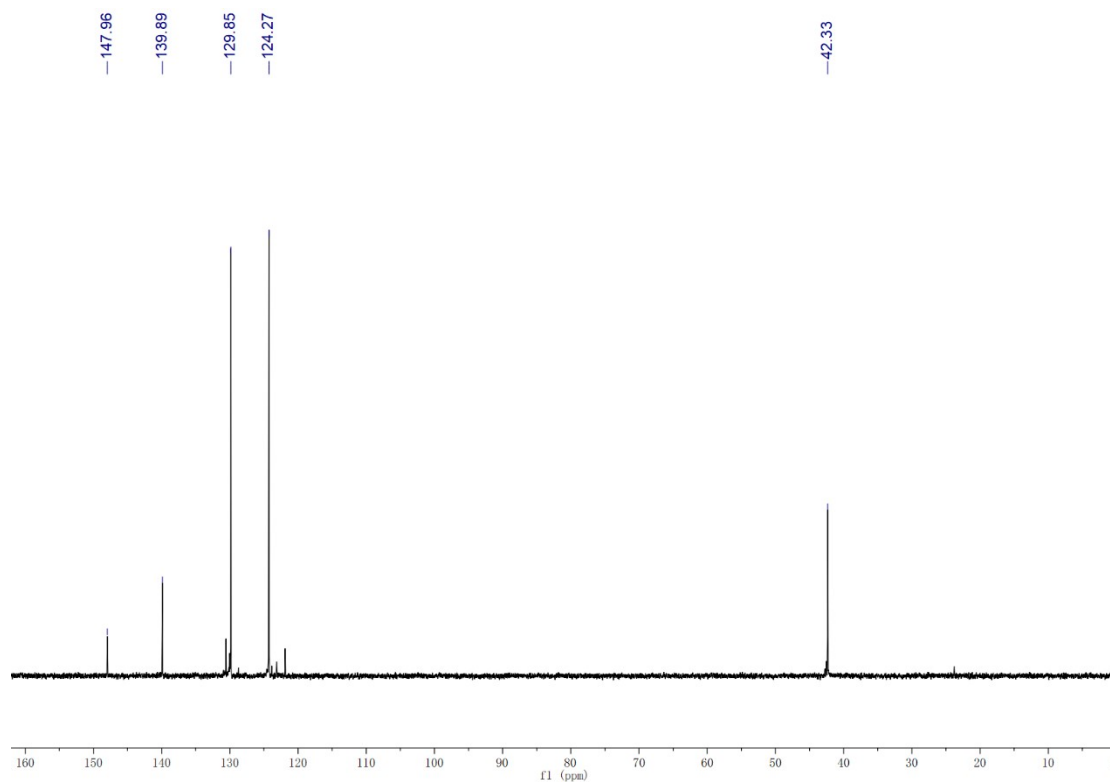

Figure S1.5.2  $^{13}\text{C}$  NMR of compound **2e** in in  $\text{D}_2\text{O}$

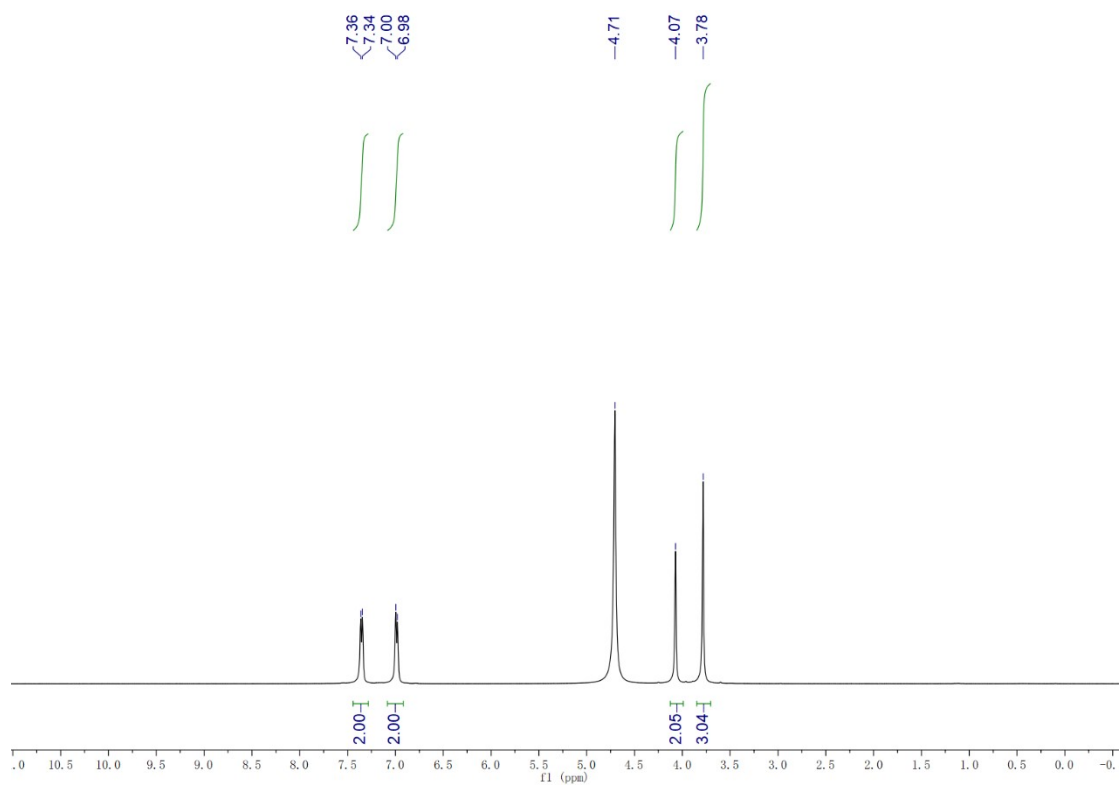

Figure S1.6.1  $^1\text{H}$  NMR of compound **2f** in  $\text{D}_2\text{O}$

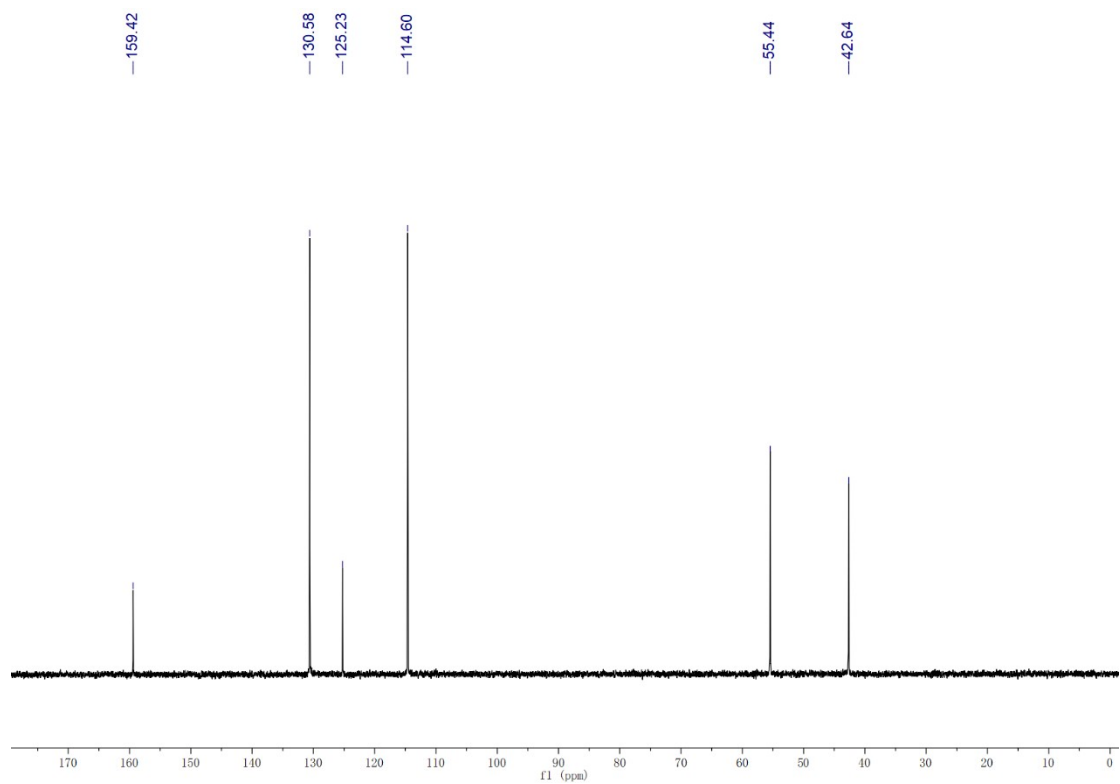

Figure S1.6.2  $^{13}\text{C}$  NMR of compound **2f** in  $\text{D}_2\text{O}$

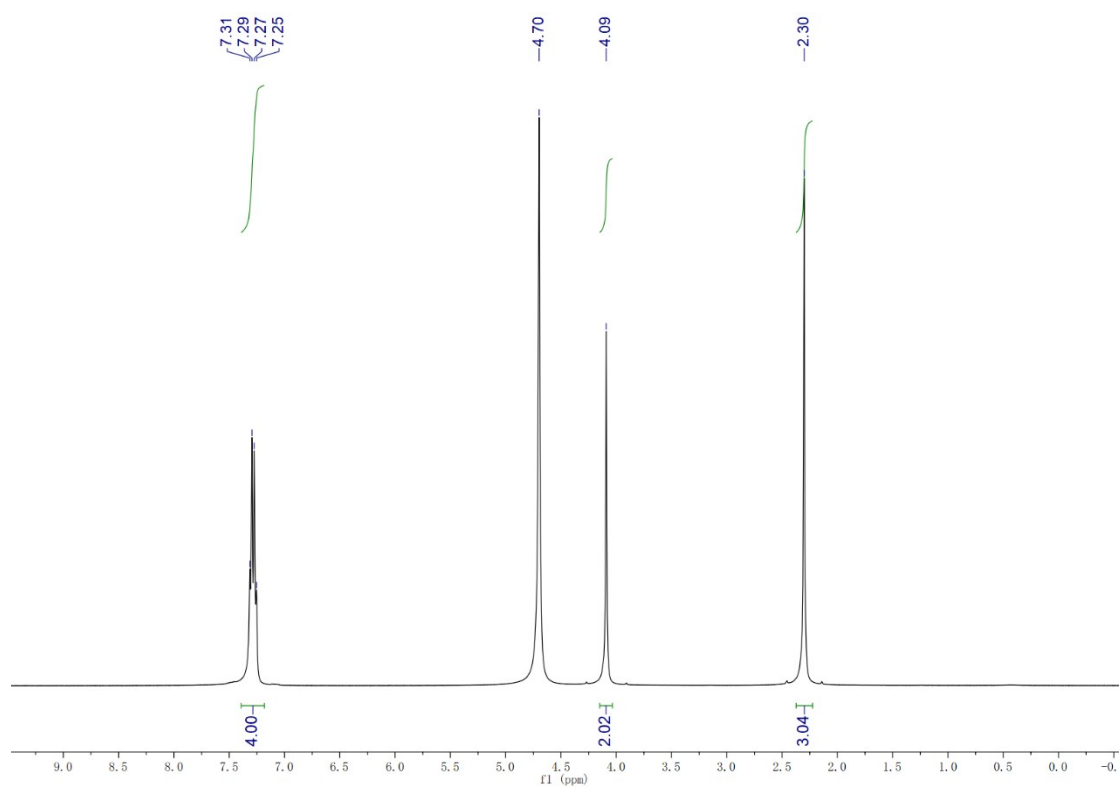

Figure S1.7.1  $^1\text{H}$  NMR of compound **2g** in  $\text{D}_2\text{O}$

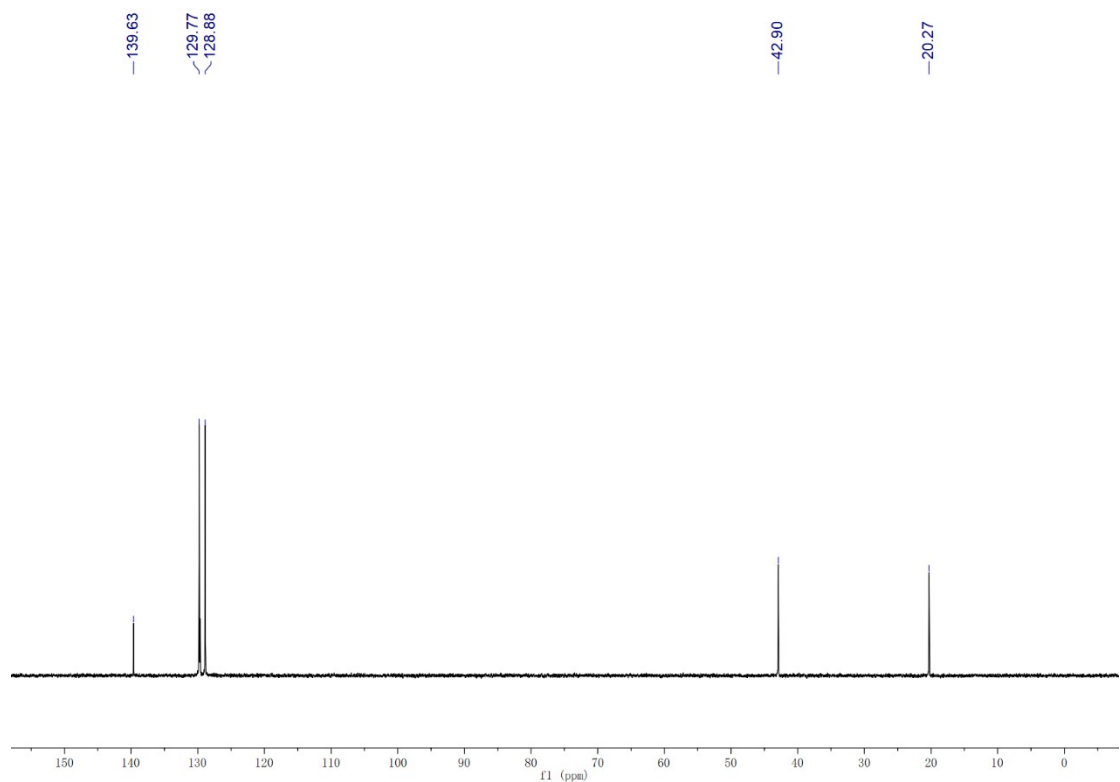

Figure S1.7.2  $^{13}\text{C}$  NMR of compound **2g** in  $\text{D}_2\text{O}$

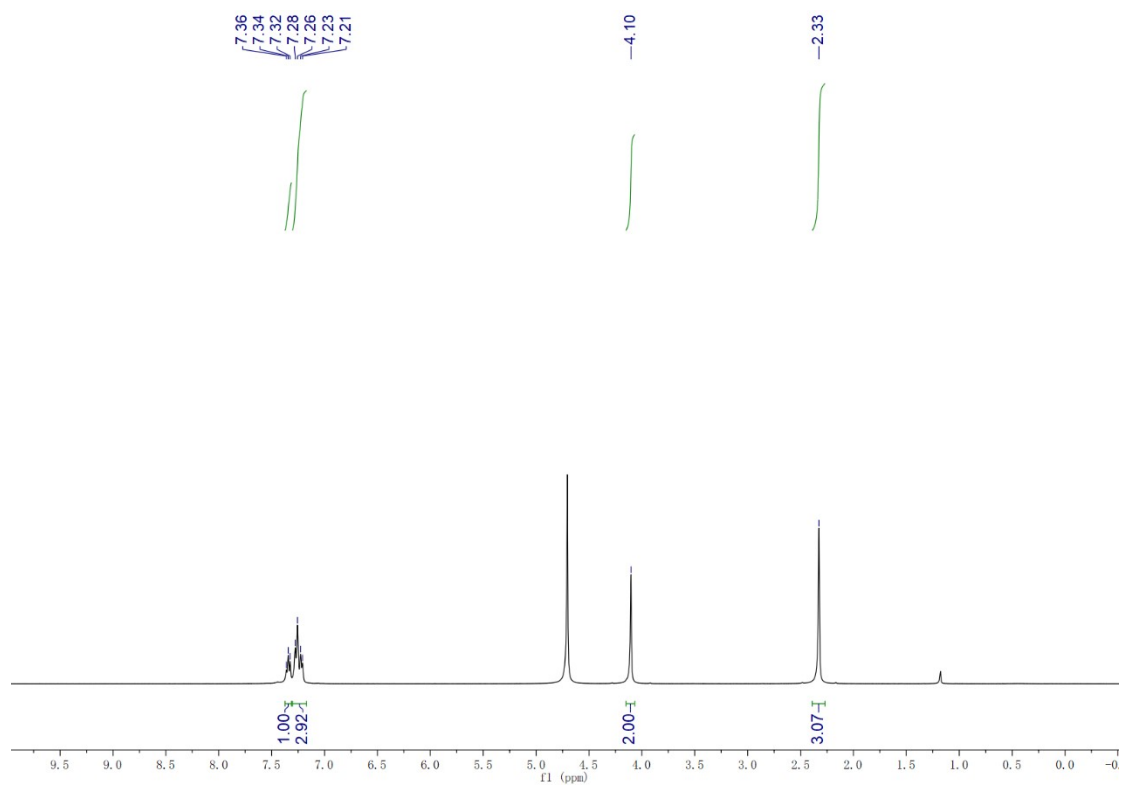

Figure S1.8.1  $^1\text{H}$  NMR of compound **2h** in  $\text{D}_2\text{O}$

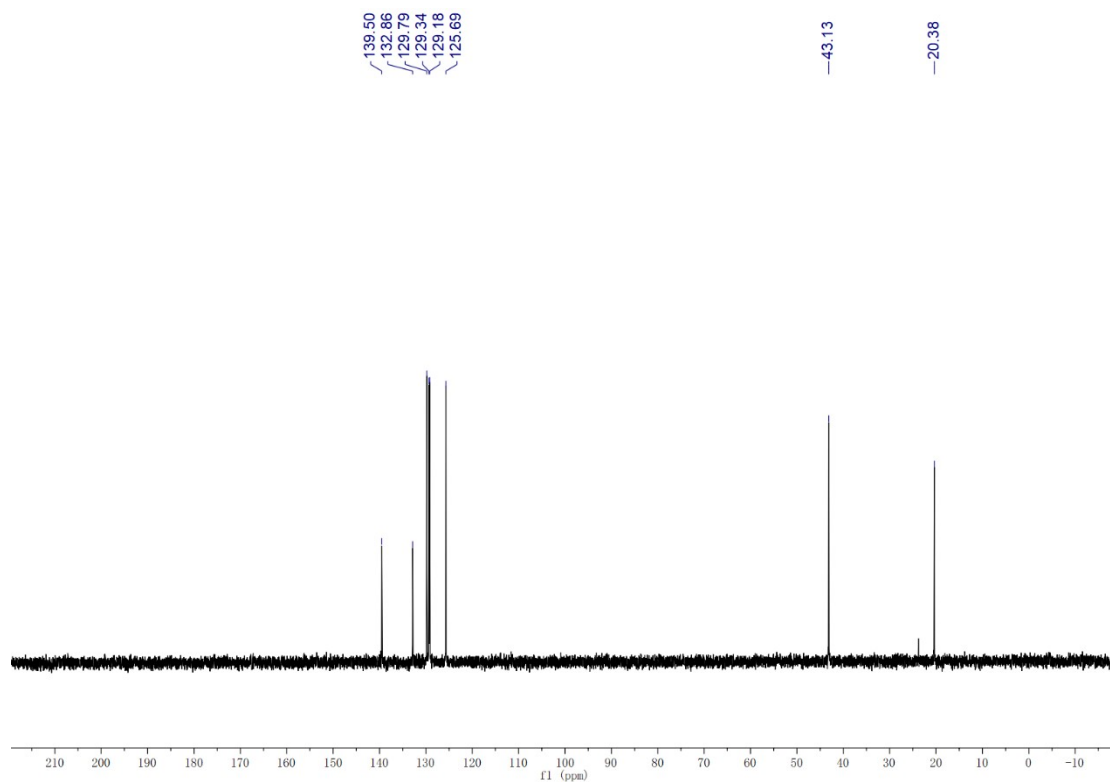

Figure S1.8.2  $^{13}\text{C}$  NMR of compound **2h** in  $\text{D}_2\text{O}$

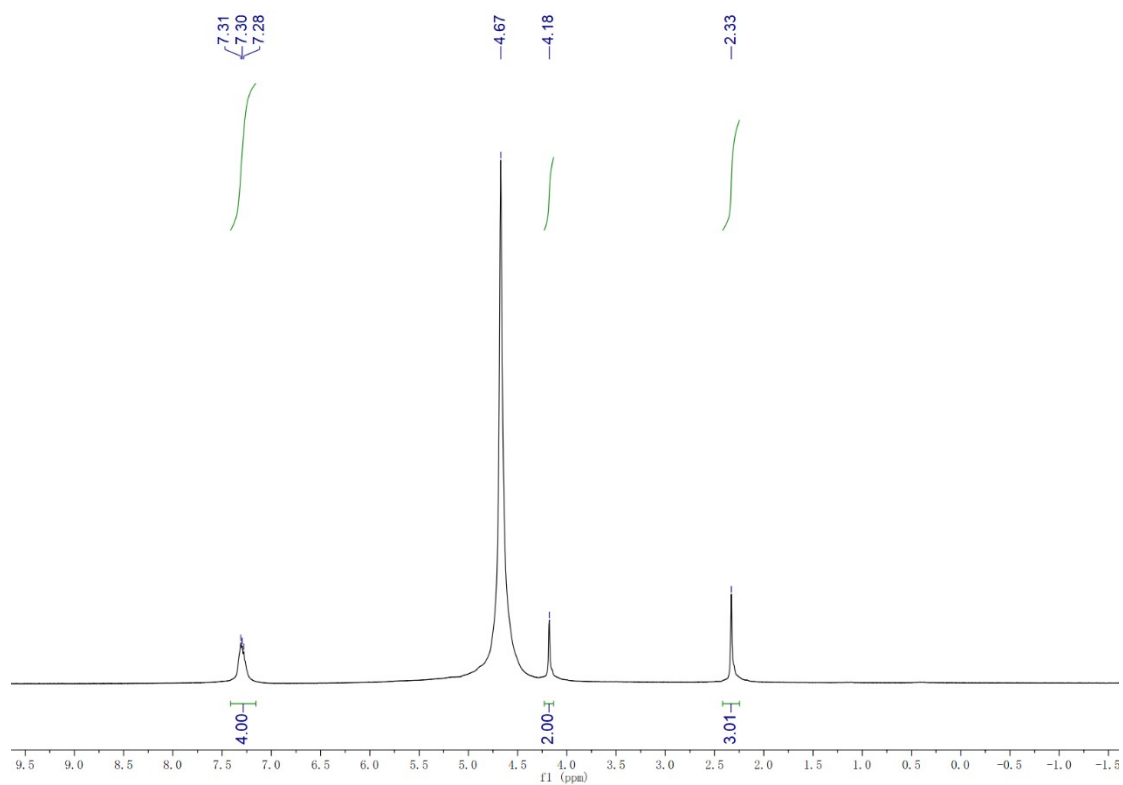

Figure S1.9.1  $^1\text{H}$  NMR of compound **2i** in  $\text{D}_2\text{O}$

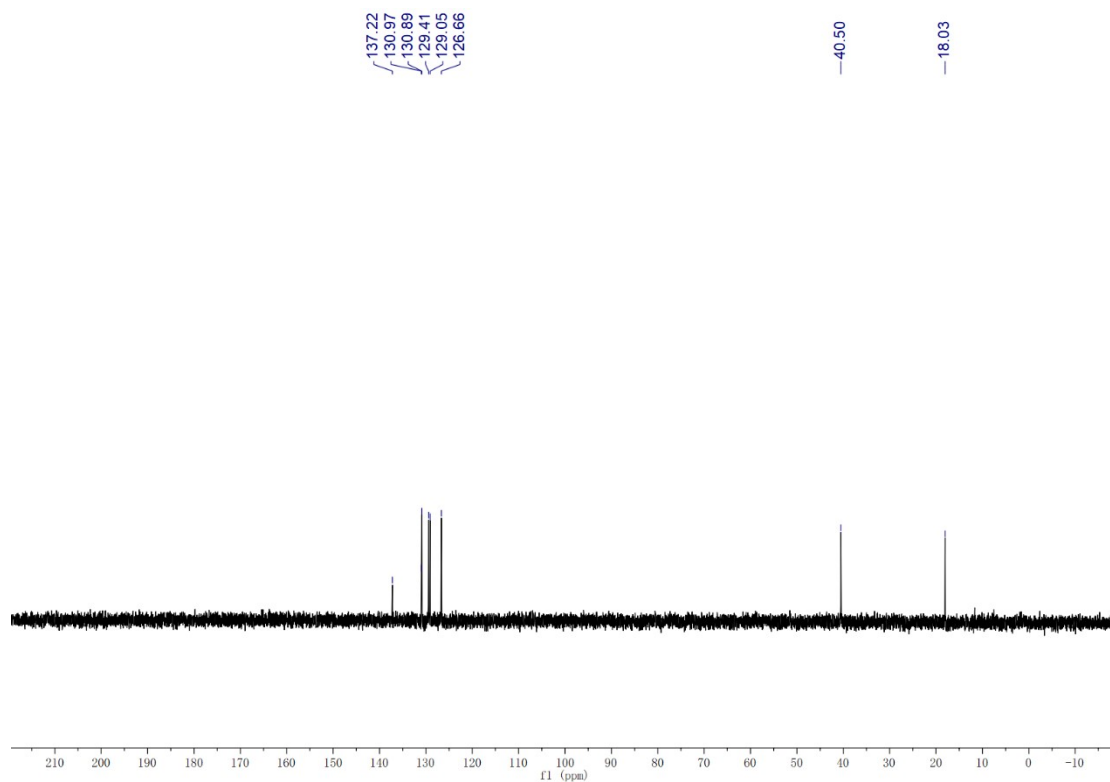

Figure S1.9.2  $^{13}\text{C}$  NMR of compound **2i** in  $\text{D}_2\text{O}$



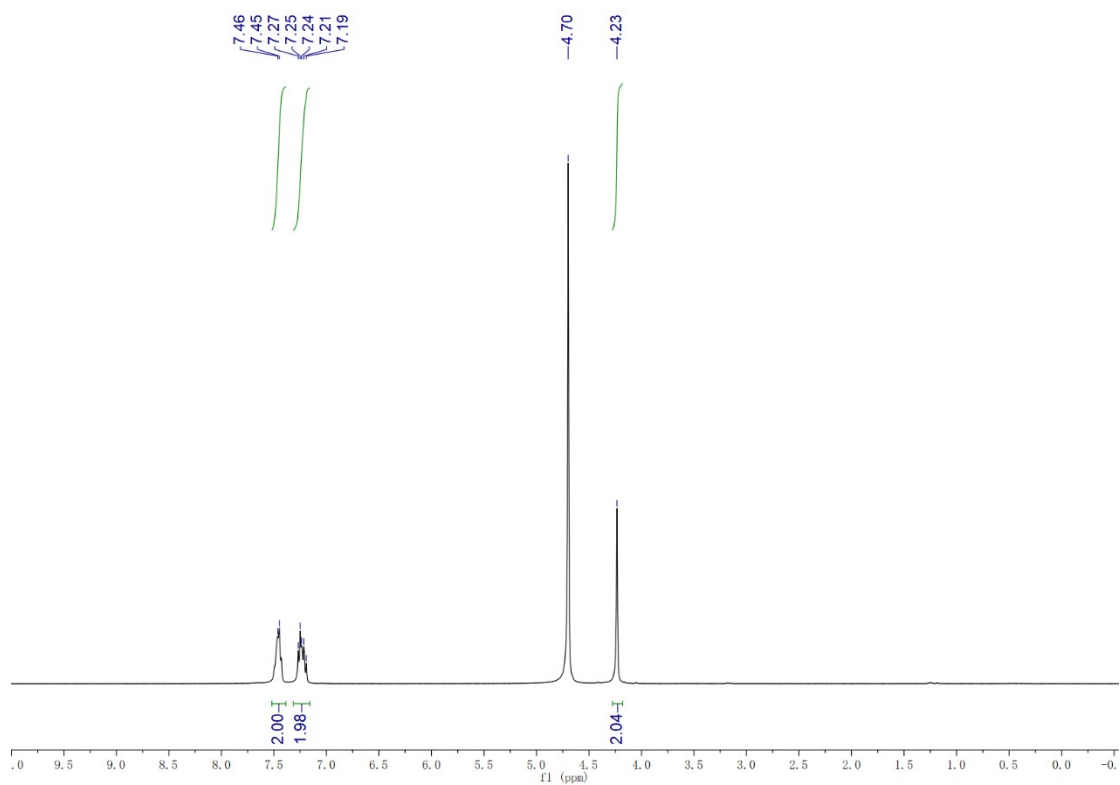

Figure S1.10.1  $^1\text{H}$  NMR of compound **2j** in  $\text{D}_2\text{O}$

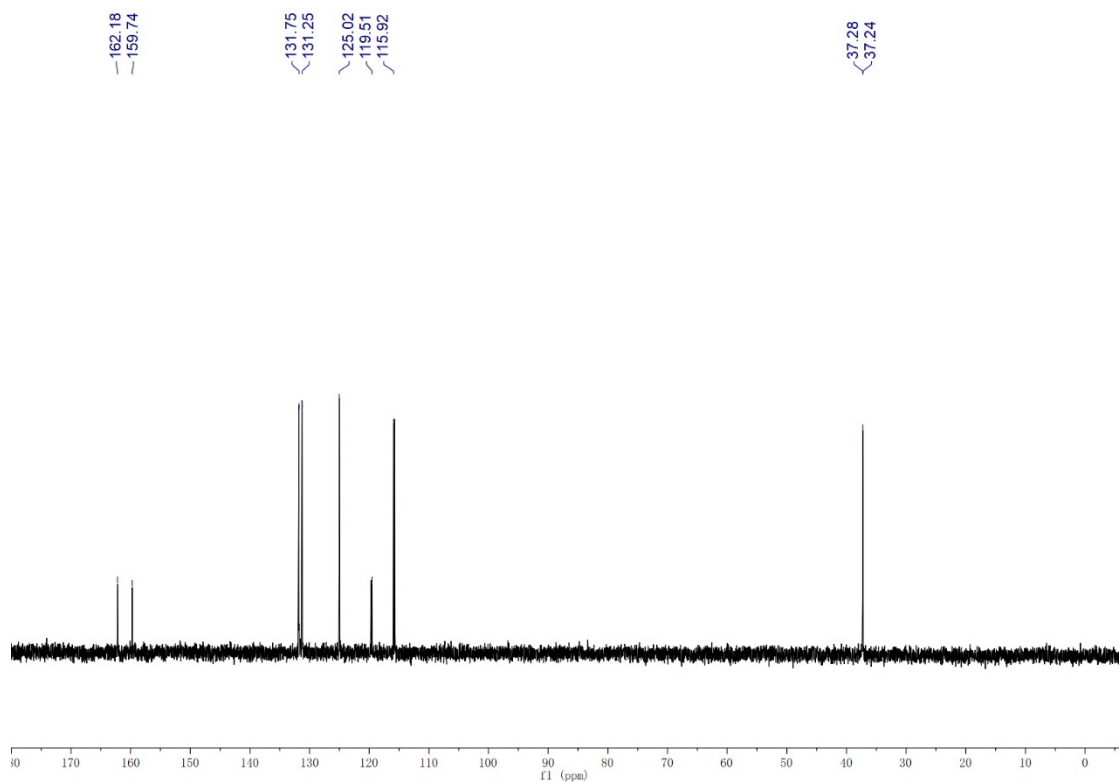

Figure S1.10.2  $^{13}\text{C}$  NMR of compound **2j** in  $\text{D}_2\text{O}$

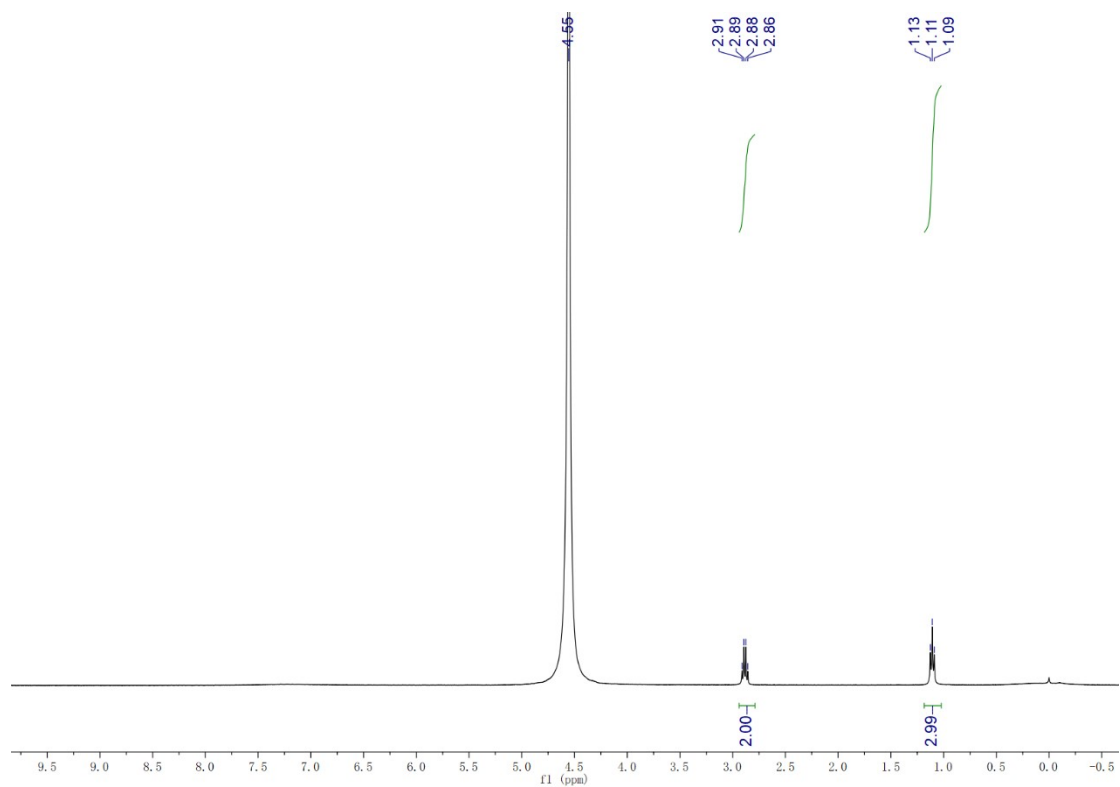

Figure S1.11.1  $^1\text{H}$  NMR of compound **2k** in  $\text{D}_2\text{O}$

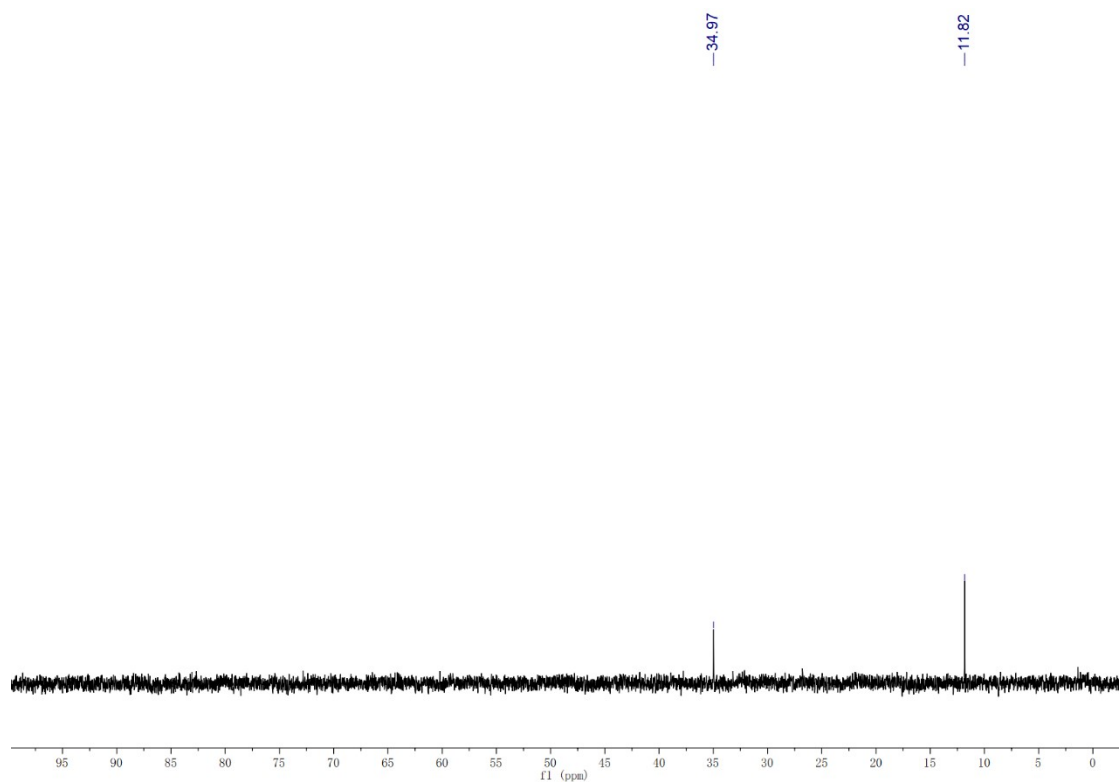

Figure S1.11.2  $^{13}\text{C}$  NMR of compound **2k** in  $\text{D}_2\text{O}$

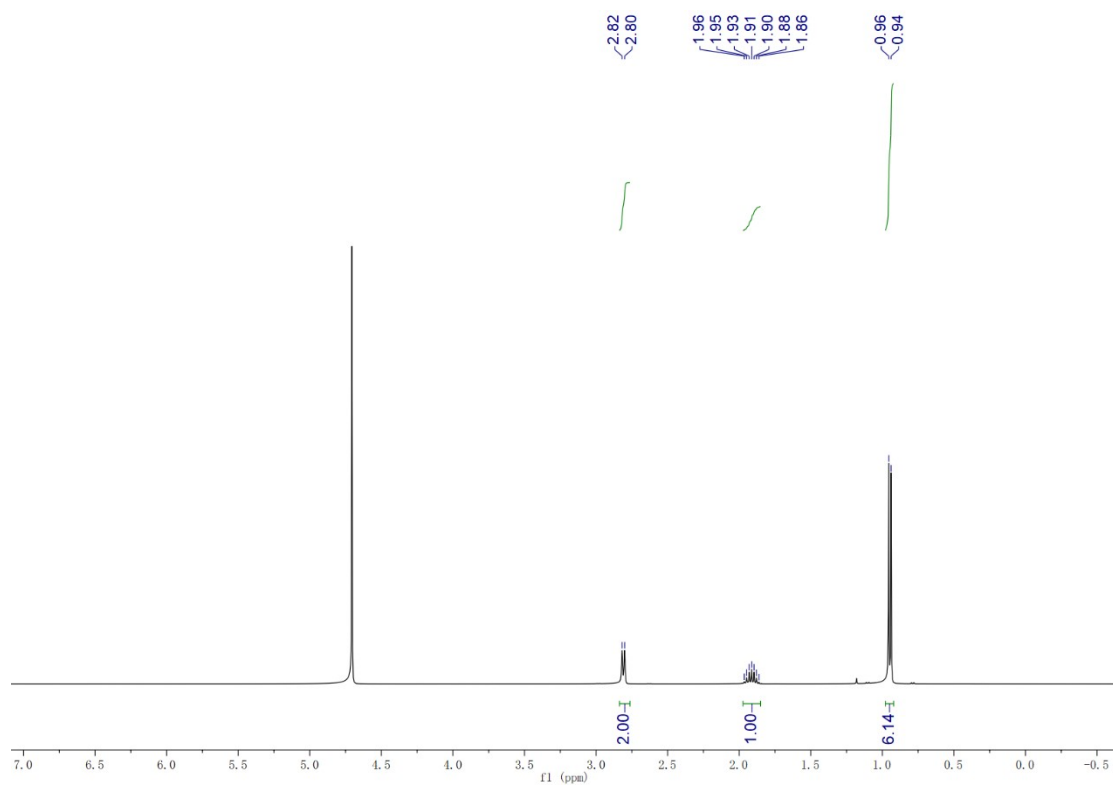

Figure S1.12.1 <sup>1</sup>H NMR of compound **2I** in D<sub>2</sub>O

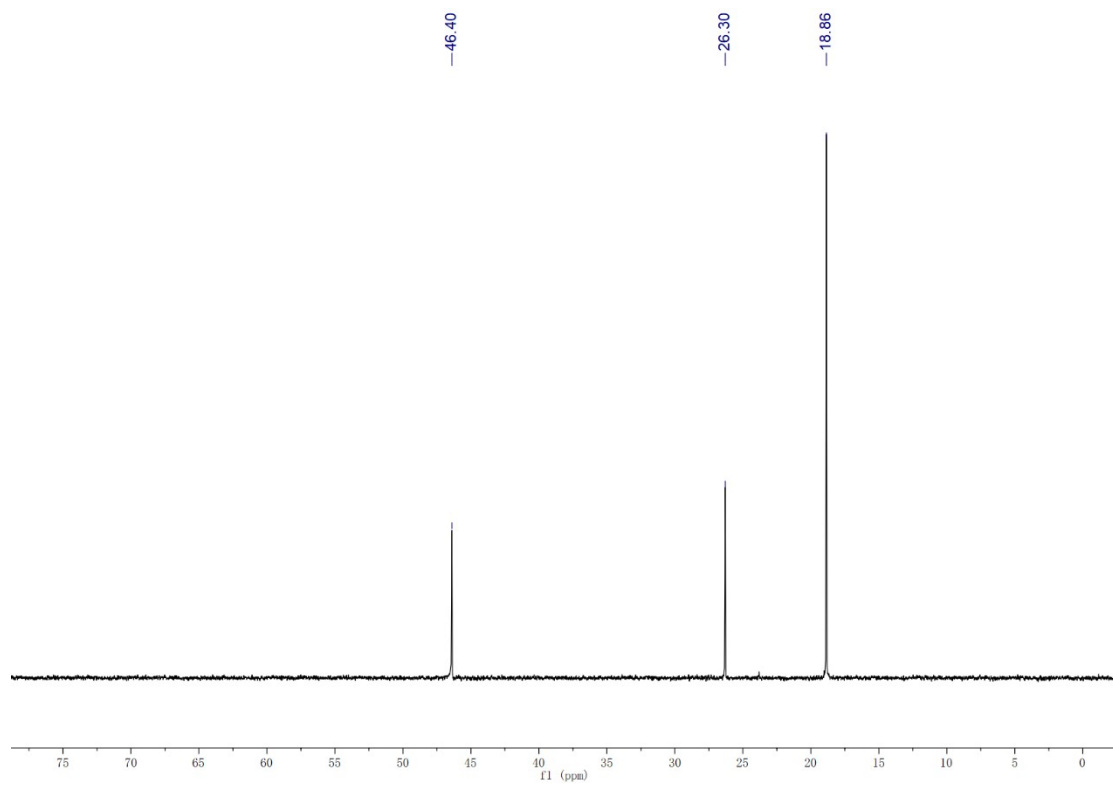

Figure S1.12.2 <sup>13</sup>C NMR of compound **2I** in D<sub>2</sub>O

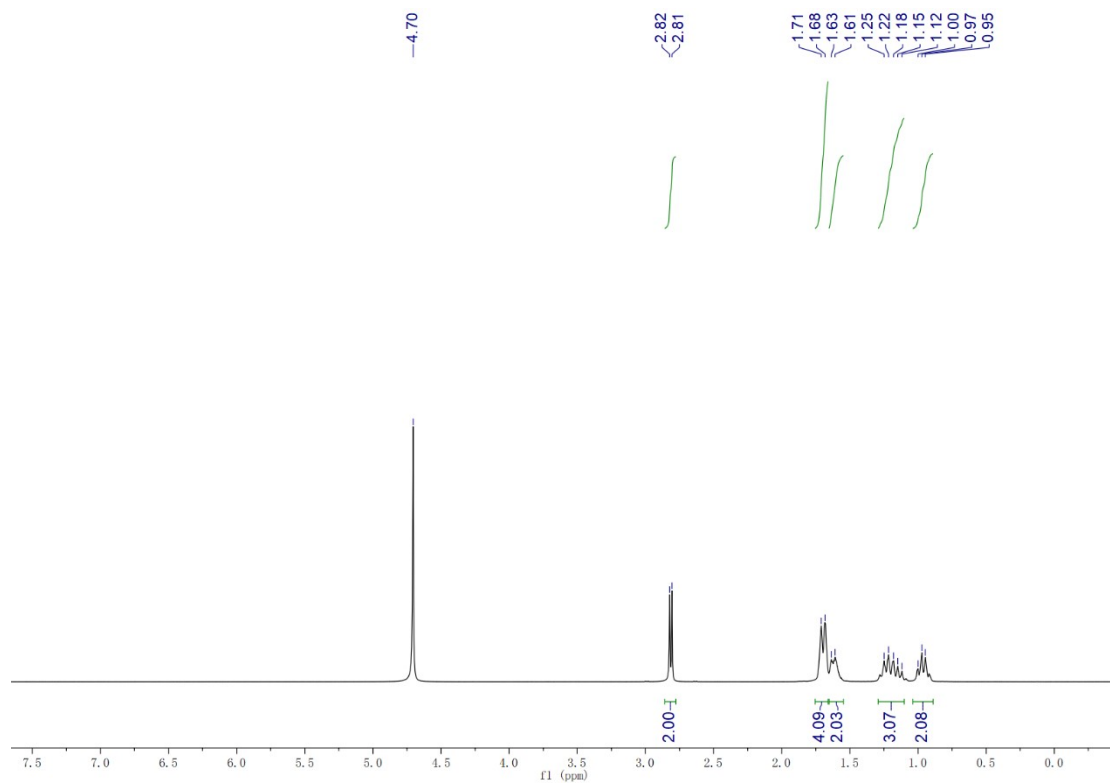

Figure S1.13.1  $^1\text{H}$  NMR of compound **2m** in  $\text{D}_2\text{O}$

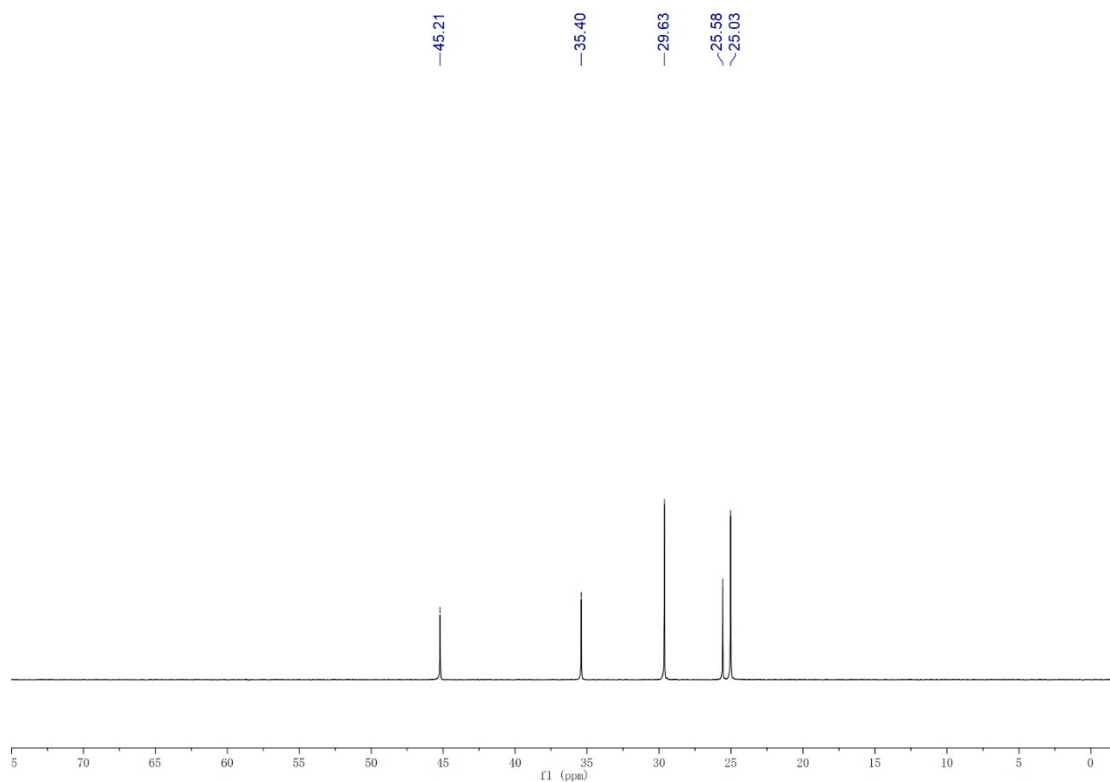

Figure S1.13.2  $^{13}\text{C}$  NMR of compound **2m** in  $\text{D}_2\text{O}$

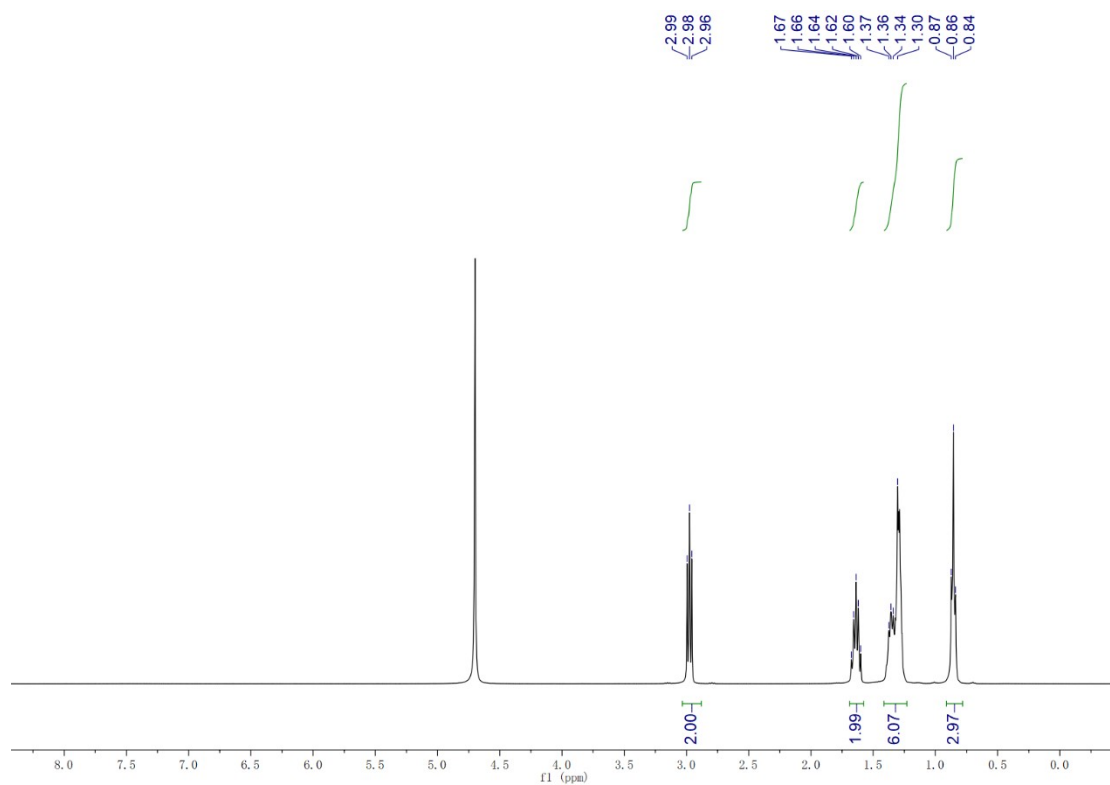

Figure S1.14.1  $^1\text{H}$  NMR of compound **2n** in  $\text{D}_2\text{O}$

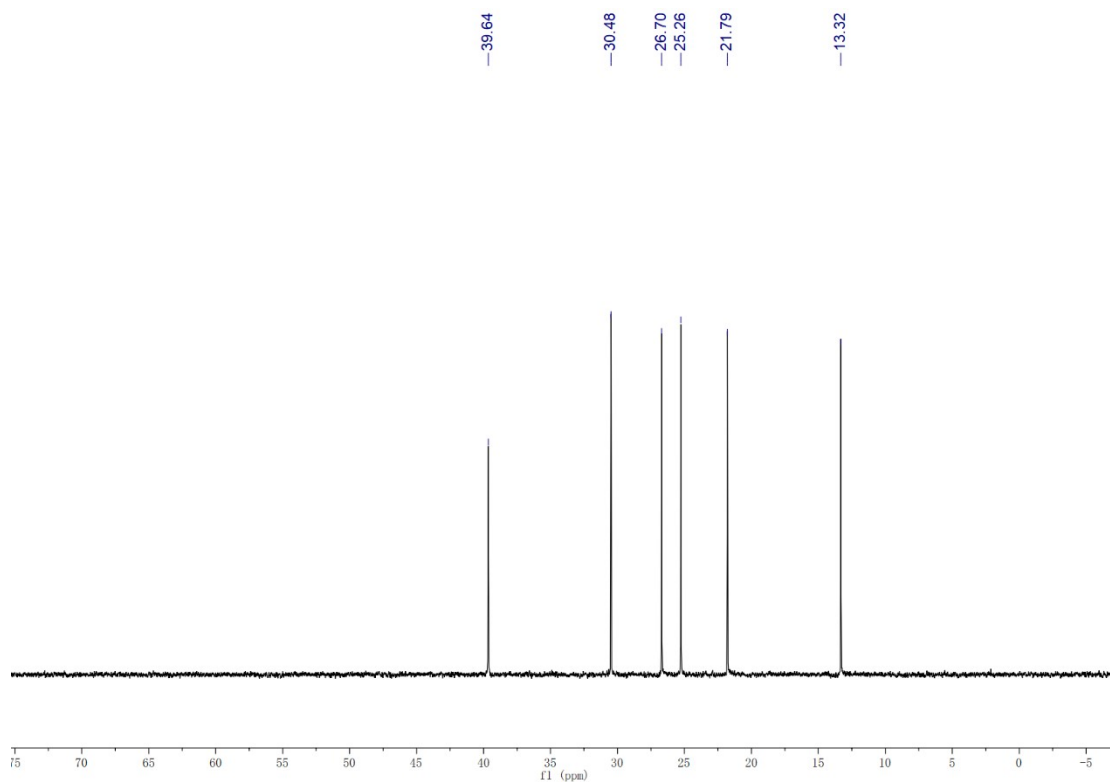

Figure S1.14.2  $^{13}\text{C}$  NMR of compound **2n** in  $\text{D}_2\text{O}$

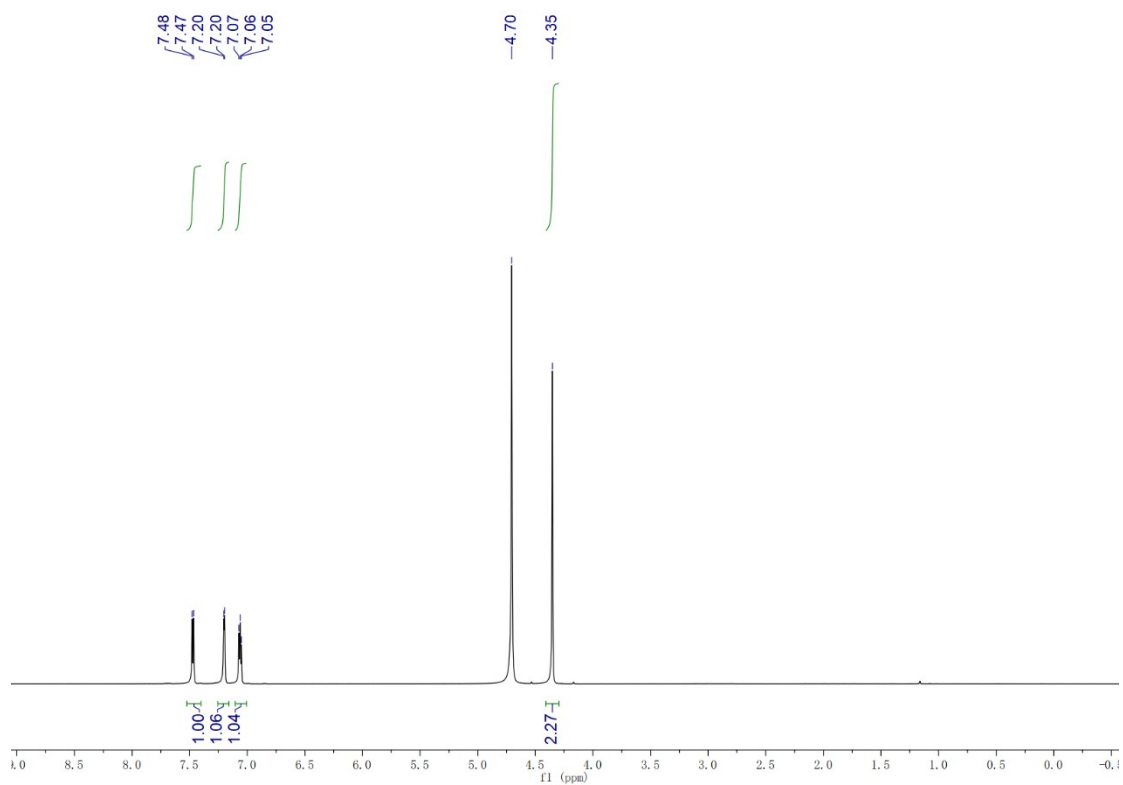

Figure S1.15.1  $^1\text{H}$  NMR of compound **2o** in  $\text{D}_2\text{O}$

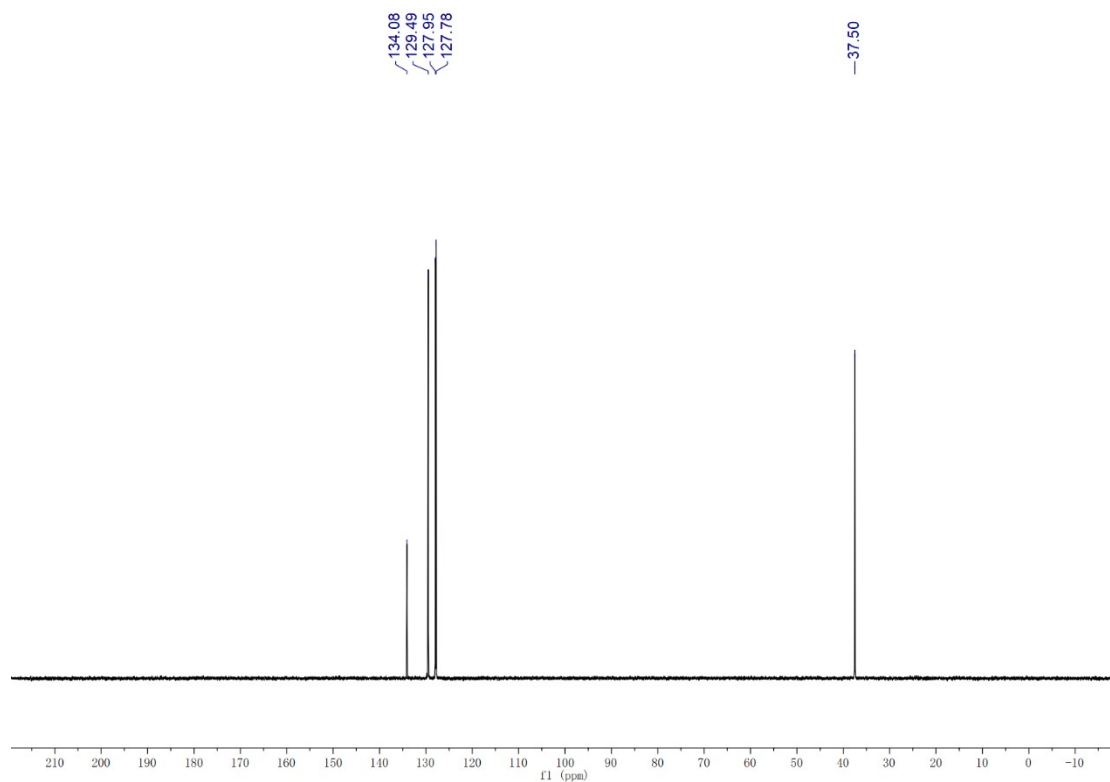

Figure S1.15.2  $^{13}\text{C}$  NMR of compound **2o** in  $\text{D}_2\text{O}$

## $^1\text{H}$ , and $^{13}\text{C}$ Spectra of Hydroboration Products of Secondary Amides

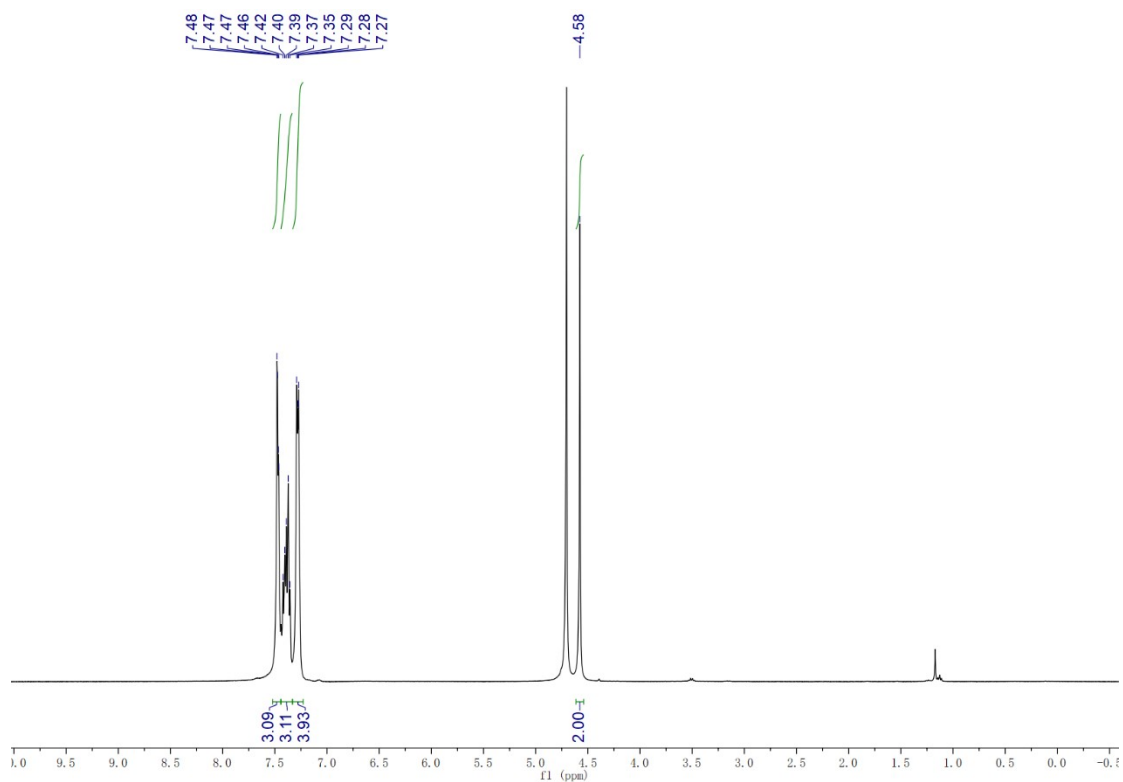

Figure S2.1.1  $^1\text{H}$  NMR of compound **4a** in  $\text{D}_2\text{O}$

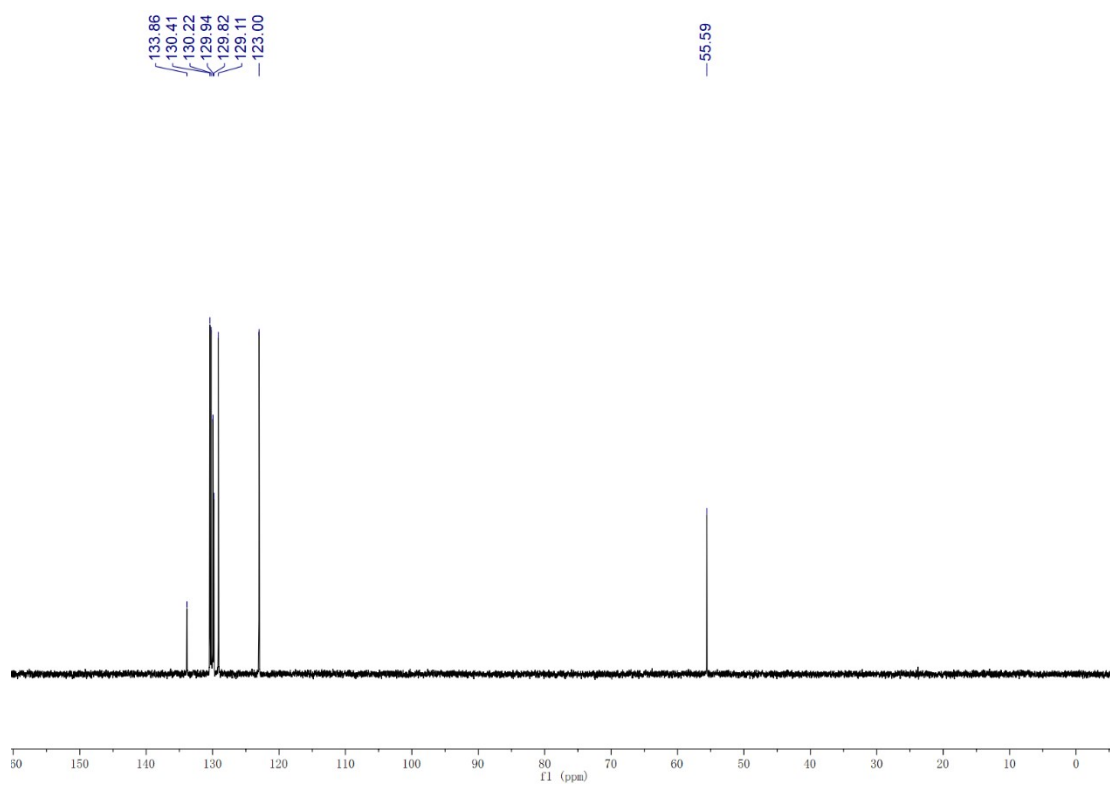

Figure S2.1.2  $^{13}\text{C}$  NMR of compound **4a** in  $\text{D}_2\text{O}$

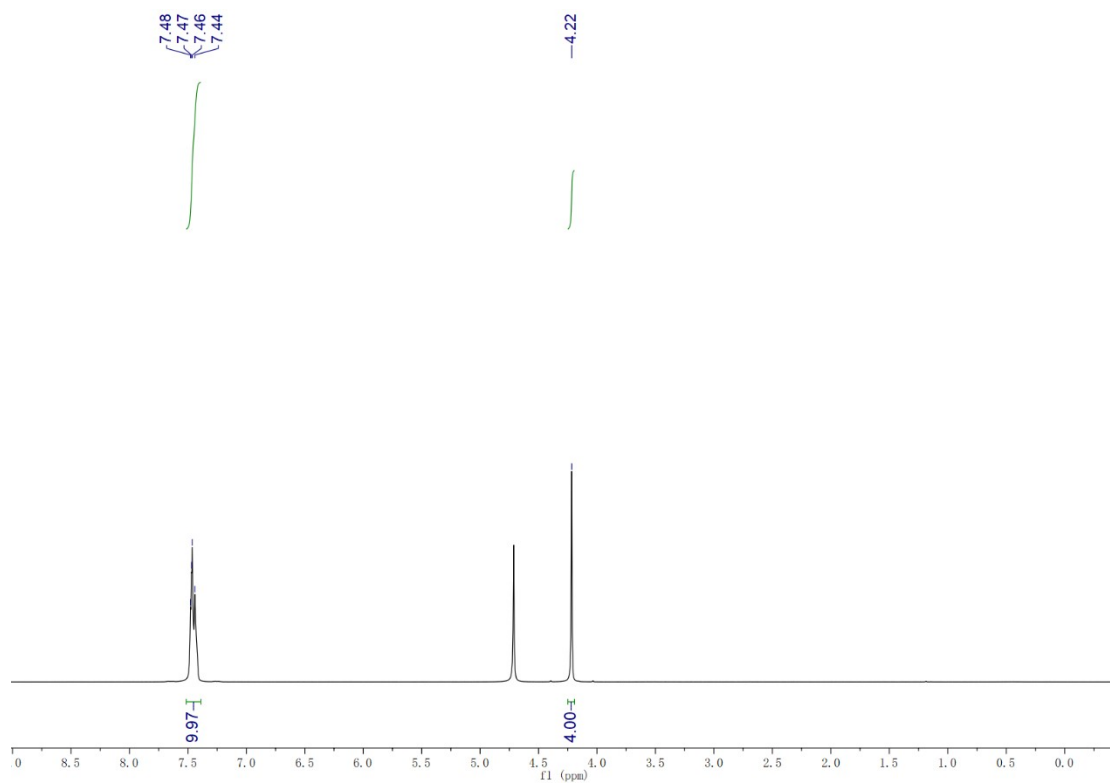

Figure S2.2.1  $^1\text{H}$  NMR of compound **4b** in  $\text{D}_2\text{O}$

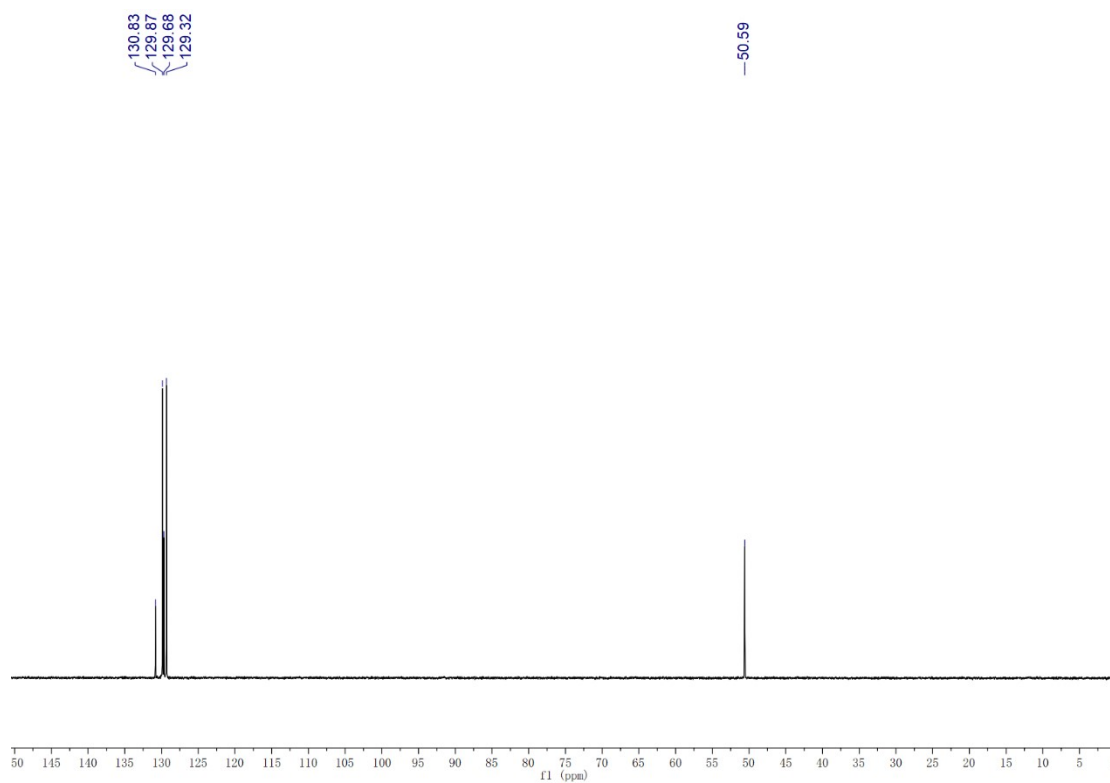

Figure S2.2.2  $^{13}\text{C}$  NMR of compound **4b** in  $\text{D}_2\text{O}$



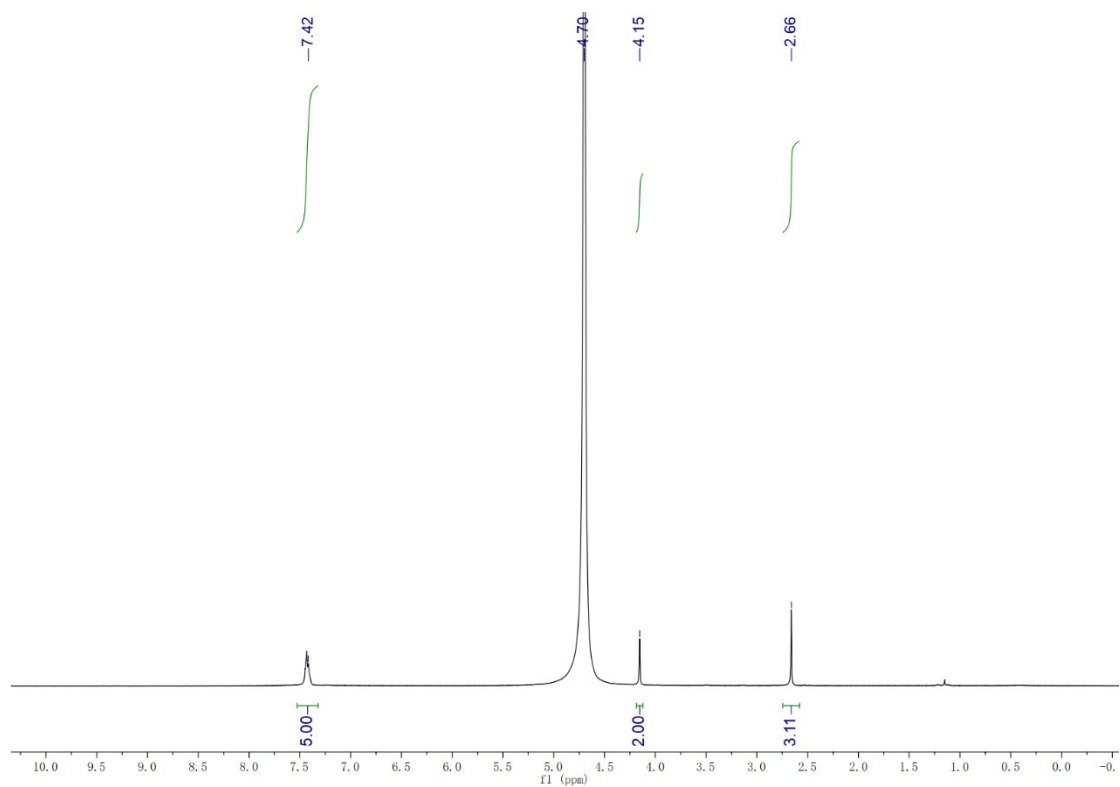

Figure S2.3.1  $^1\text{H}$  NMR of compound **4c** in  $\text{D}_2\text{O}$

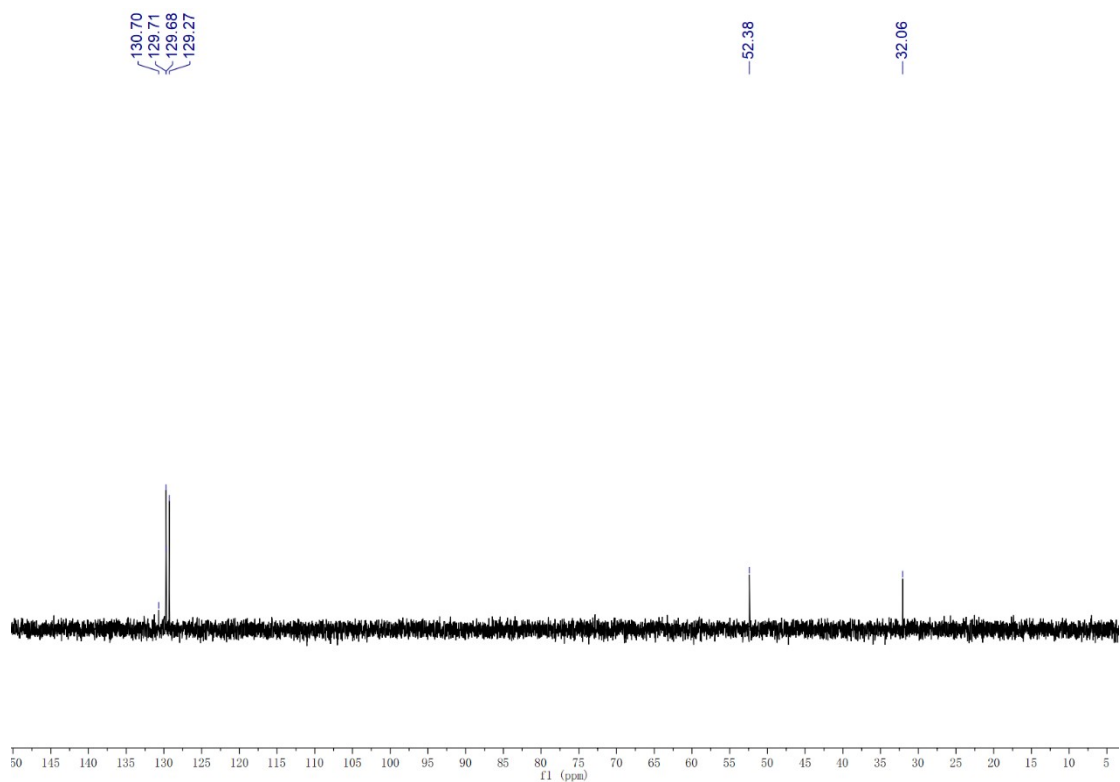

Figure S2.3.2  $^{13}\text{C}$  NMR of compound **4c** in  $\text{D}_2\text{O}$

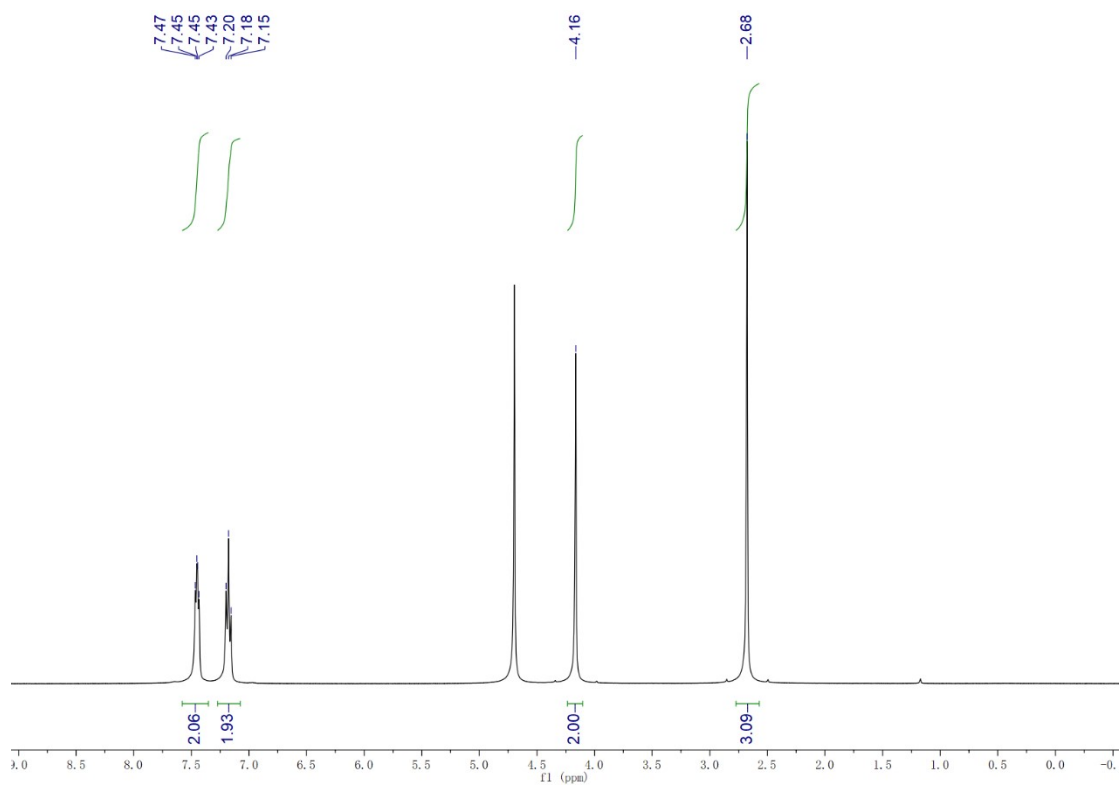

Figure S2.4.1  $^1\text{H}$  NMR of compound **4d** in  $\text{D}_2\text{O}$

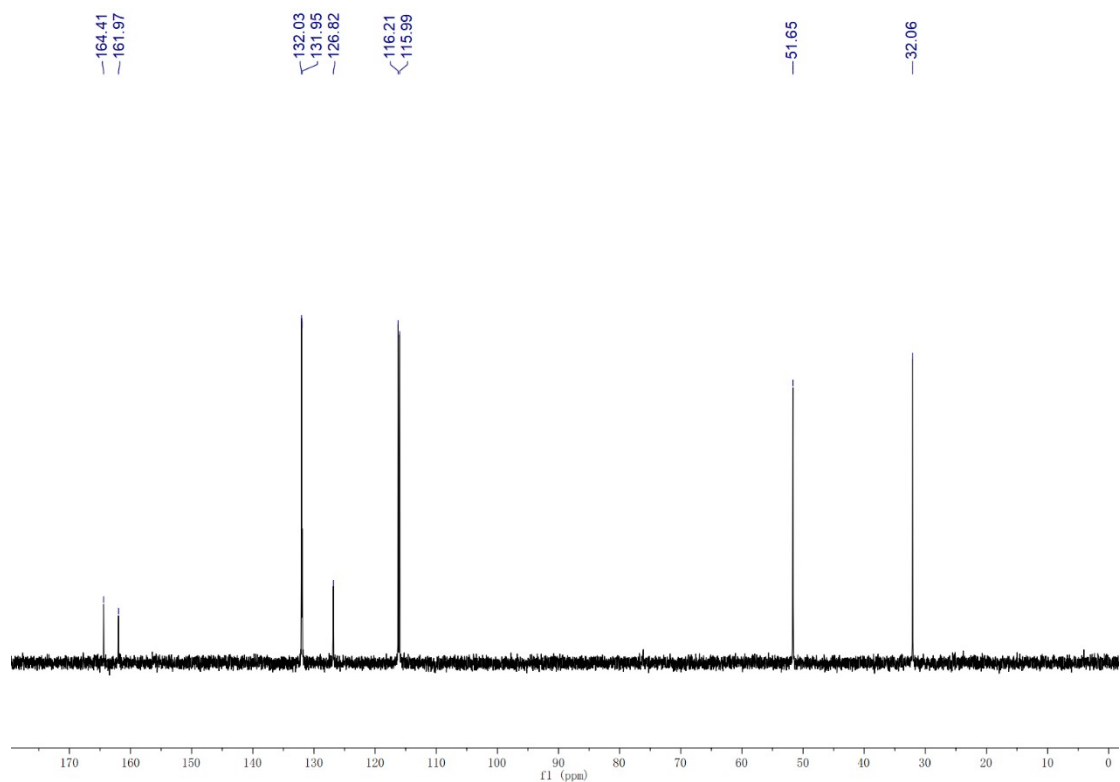

Figure S2.4.2  $^{13}\text{C}$  NMR of compound **4d** in  $\text{D}_2\text{O}$

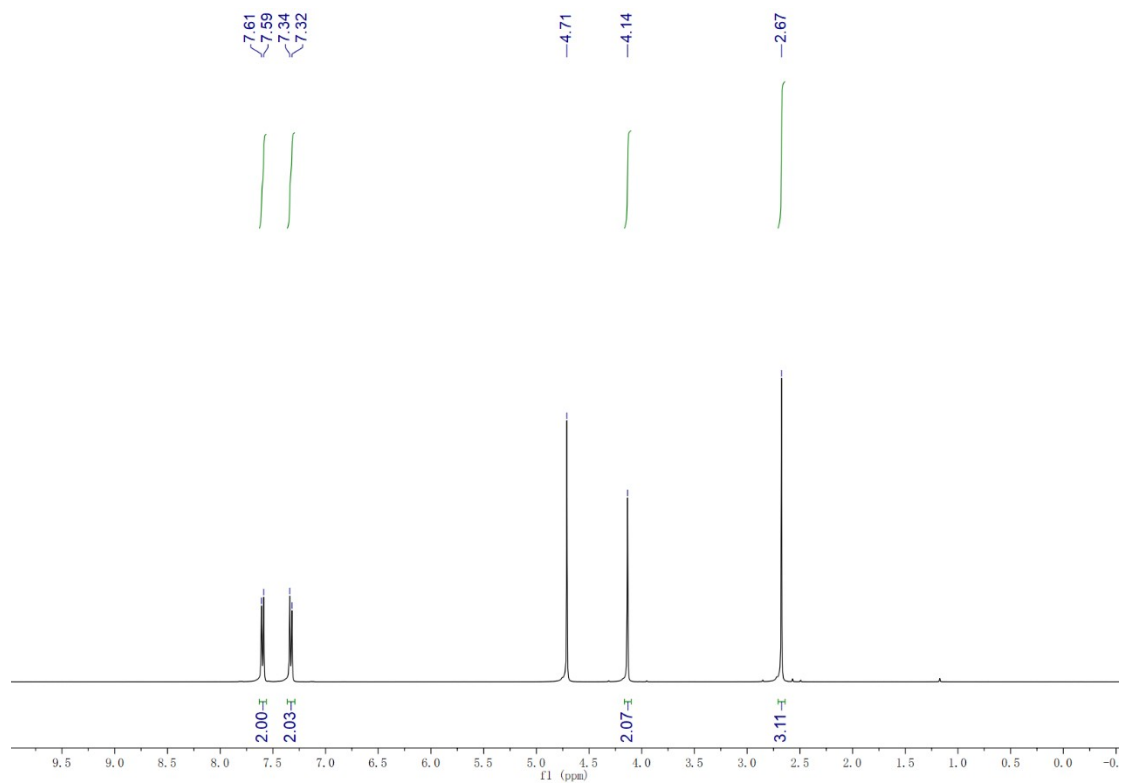

Figure S2.5.1  $^1\text{H}$  NMR of compound **4e** in  $\text{D}_2\text{O}$

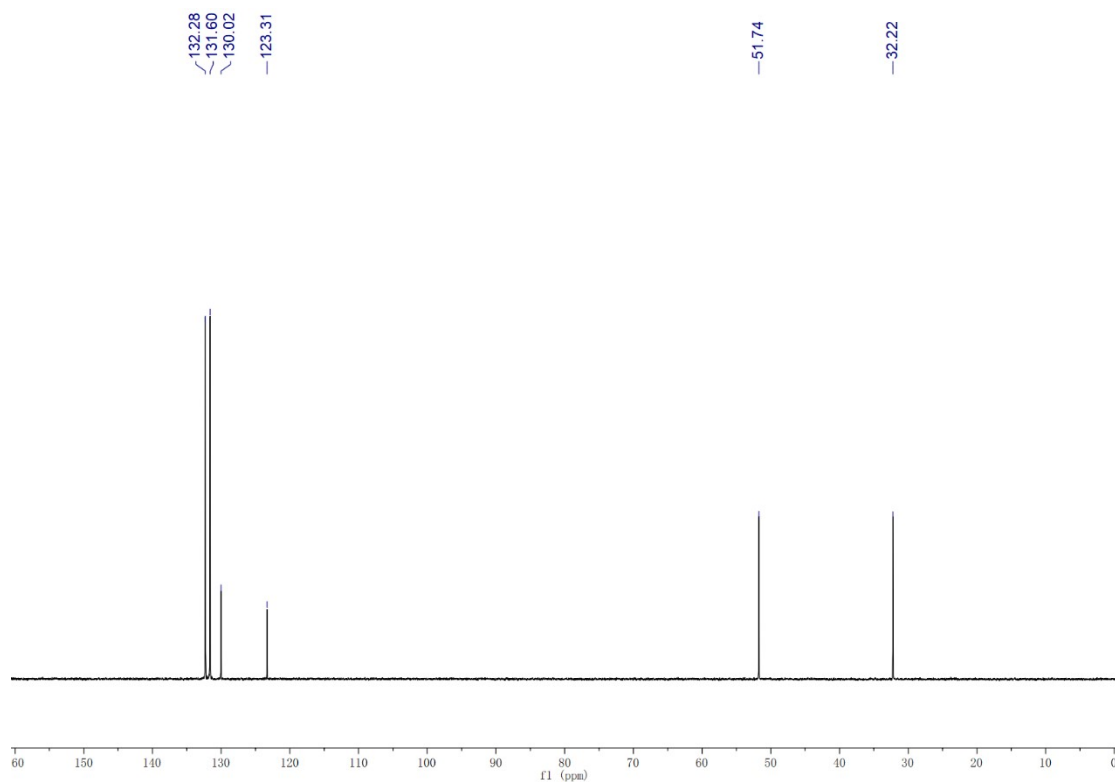

Figure S2.5.2  $^{13}\text{C}$  NMR of compound **4e** in  $\text{D}_2\text{O}$

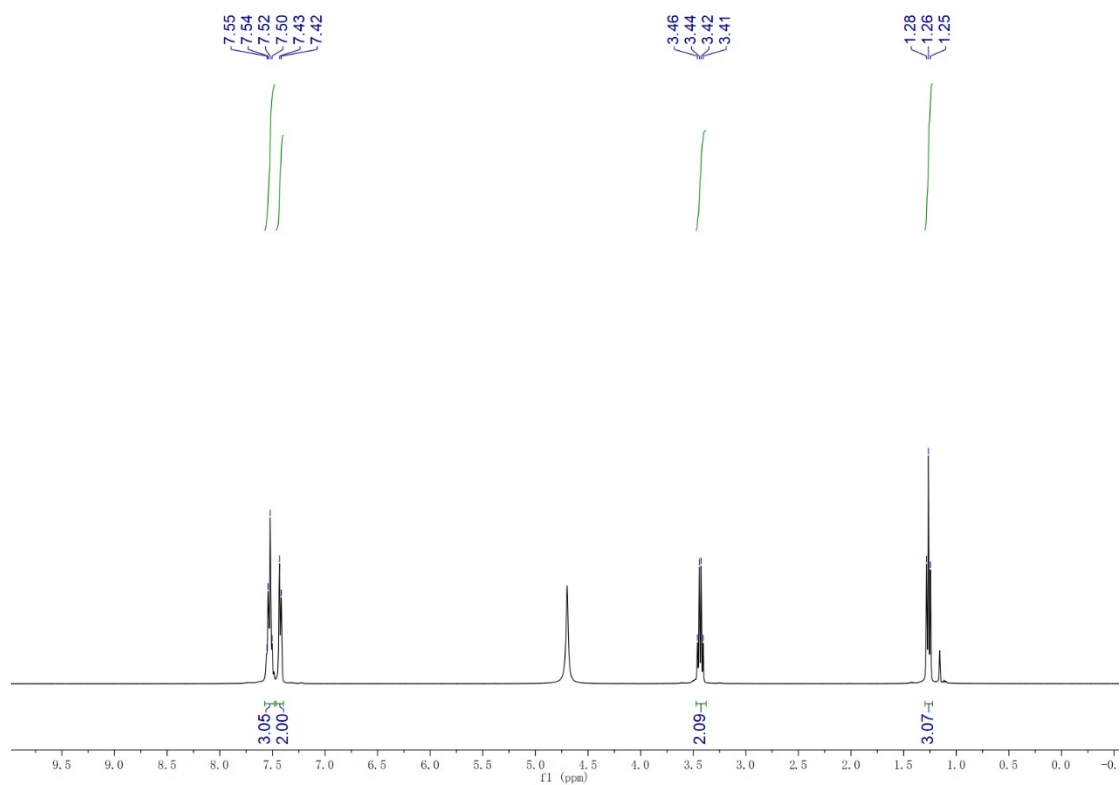

Figure S2.6.1  $^1\text{H}$  NMR of compound **4f** in  $\text{D}_2\text{O}$

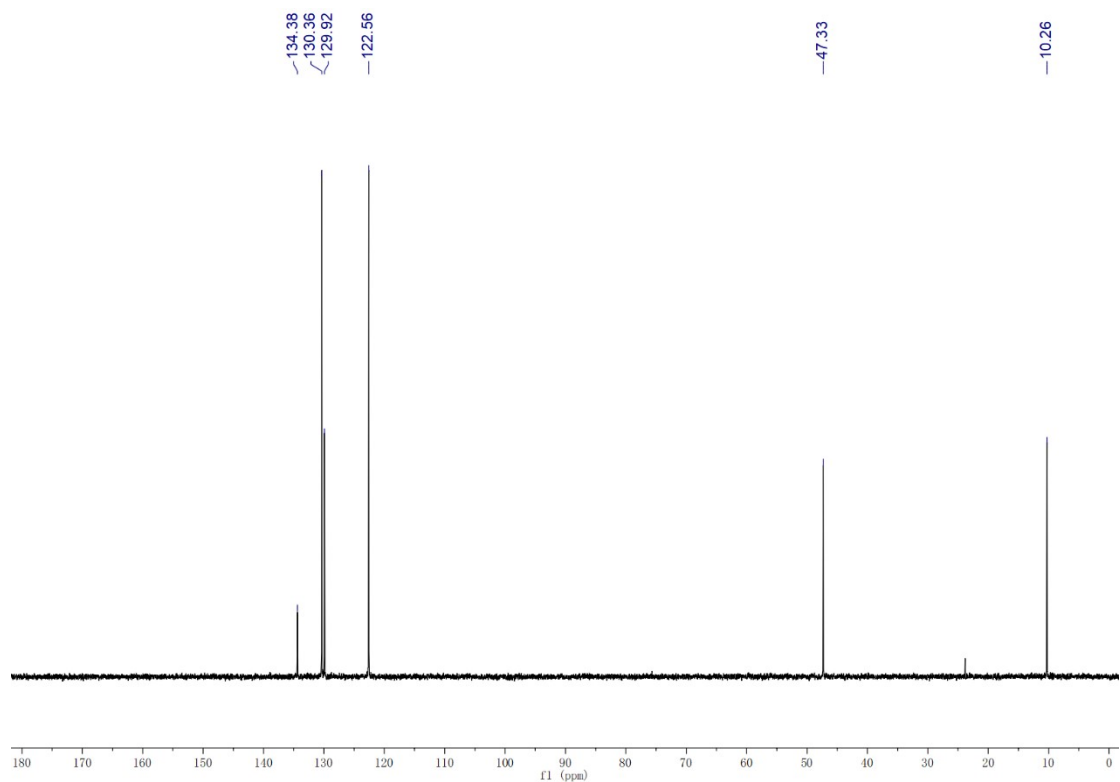

Figure S2.6.2  $^{13}\text{C}$  NMR of compound **4f** in  $\text{D}_2\text{O}$

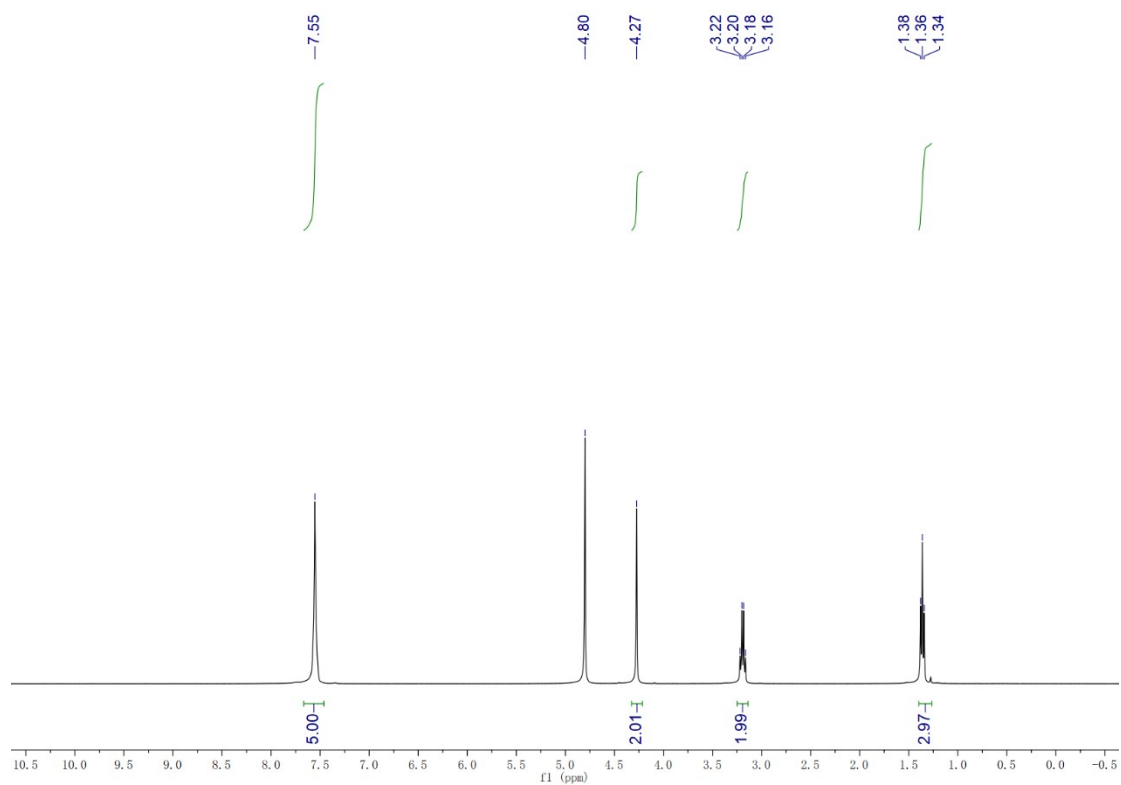

Figure S2.7.1  $^1\text{H}$  NMR of compound **4g** in  $\text{D}_2\text{O}$

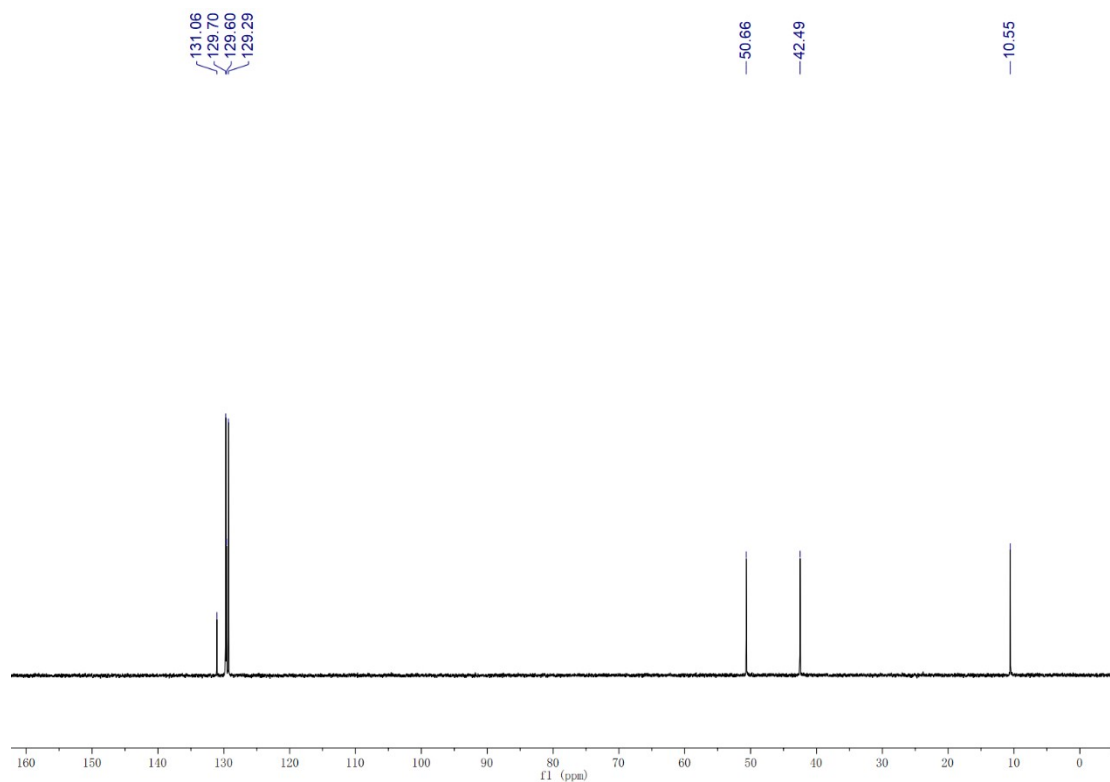

Figure S2.7.2  $^{13}\text{C}$  NMR of compound **4g** in  $\text{D}_2\text{O}$

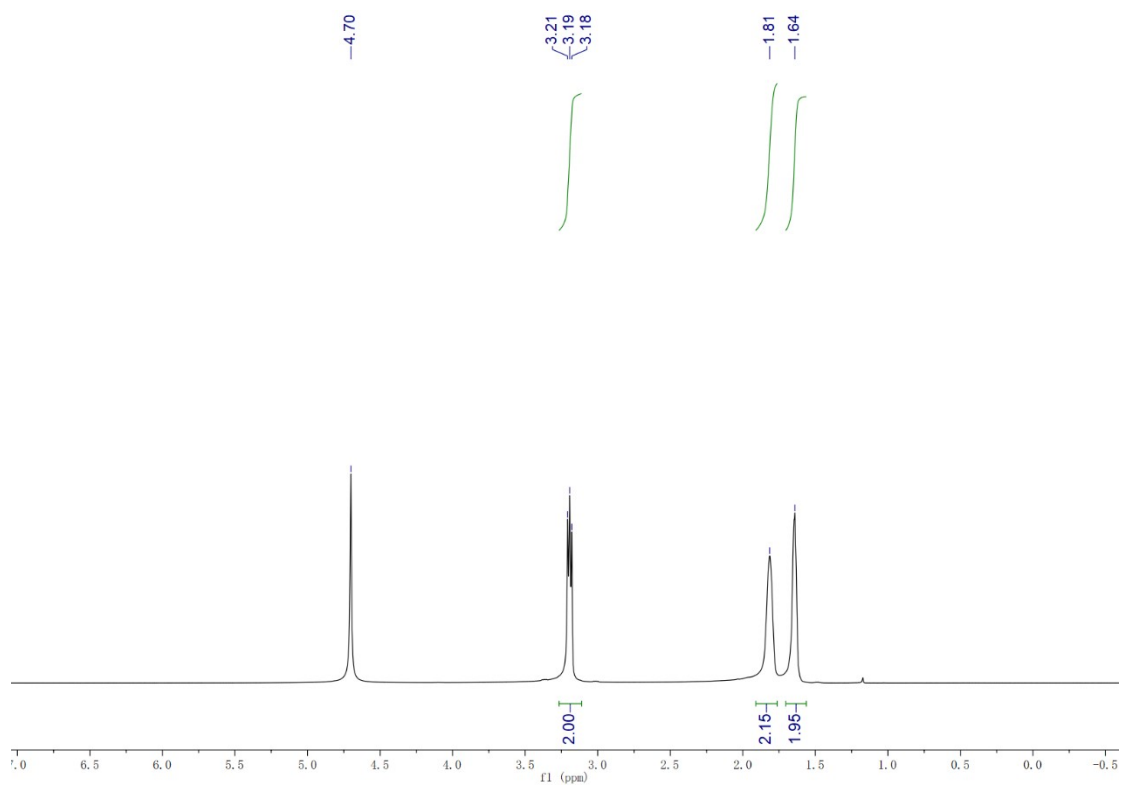

Figure S2.8.1  $^1\text{H}$  NMR of compound **4h** in  $\text{D}_2\text{O}$

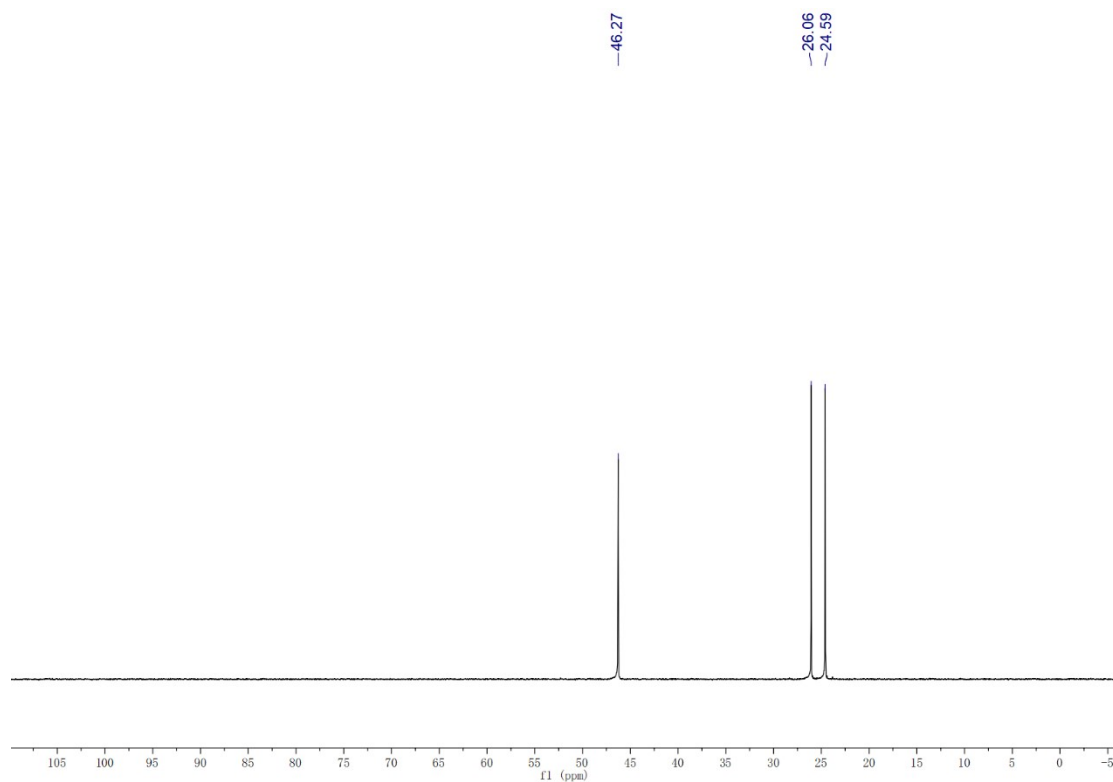

Figure S2.8.2  $^{13}\text{C}$  NMR of compound **4h** in  $\text{D}_2\text{O}$

## $^1\text{H}$ , and $^{13}\text{C}$ Spectra of Hydroboration Products of Tertiary Amides

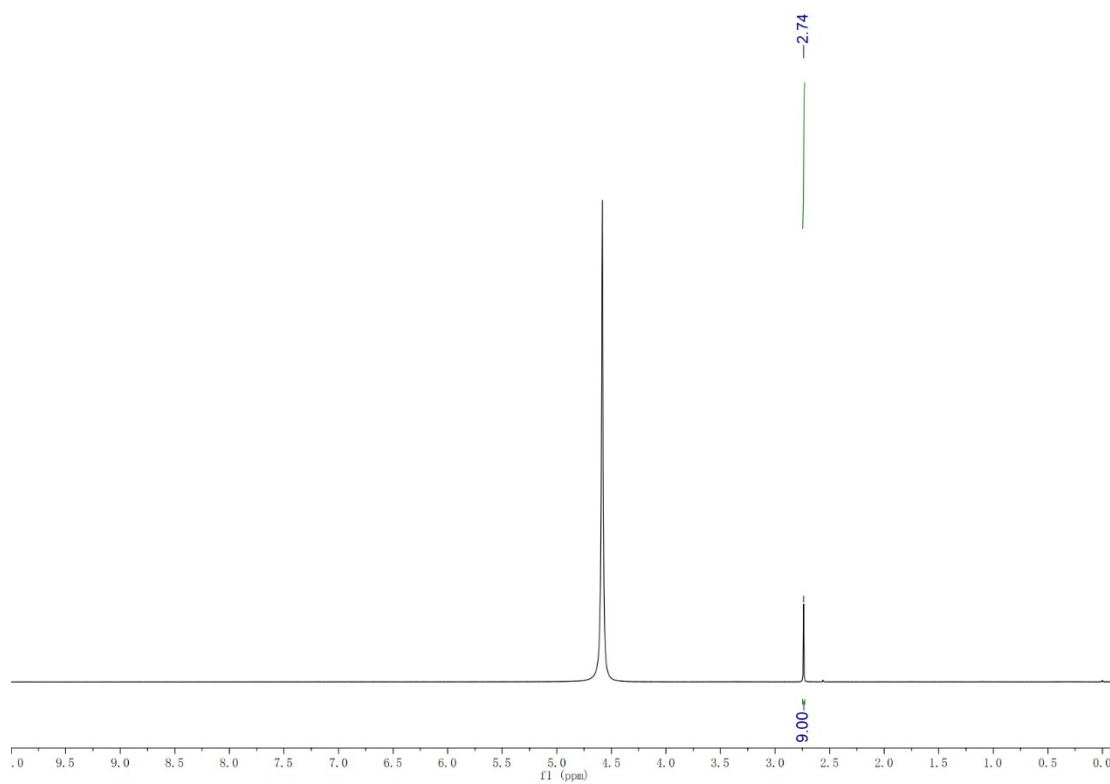

Figure S3.1.1  $^1\text{H}$  NMR of compound **6a** in  $\text{D}_2\text{O}$

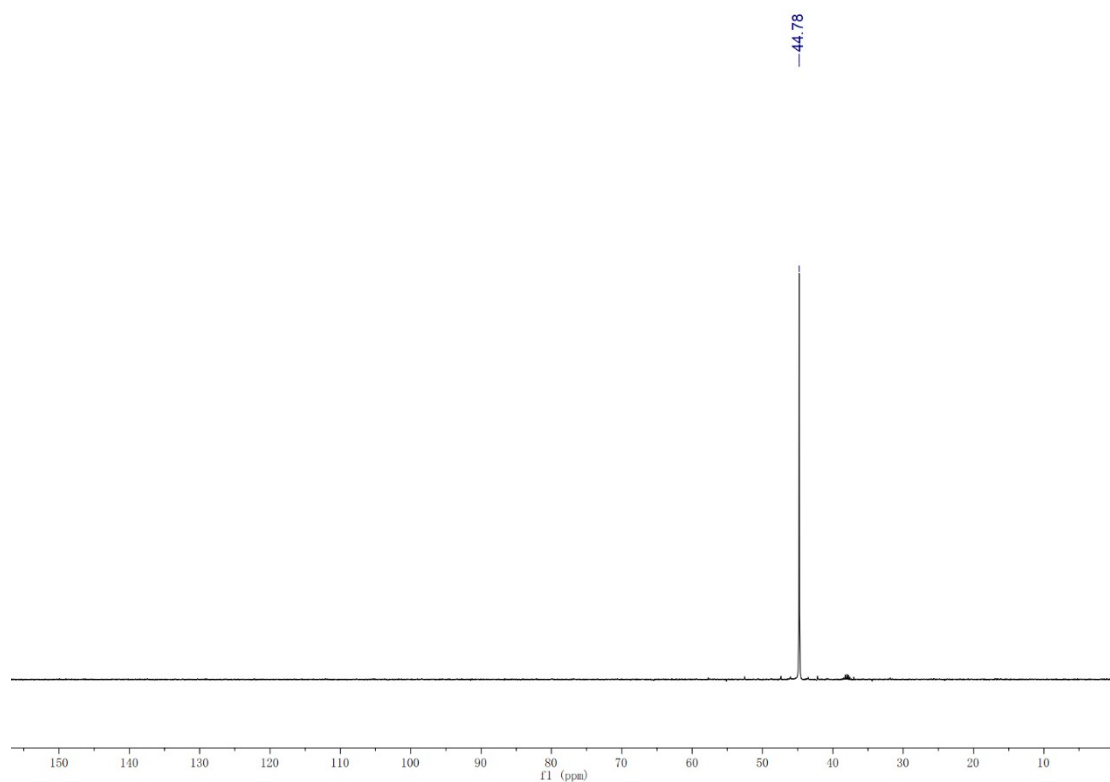

Figure S3.1.2  $^{13}\text{C}$  NMR of compound **6a** in  $\text{D}_2\text{O}$

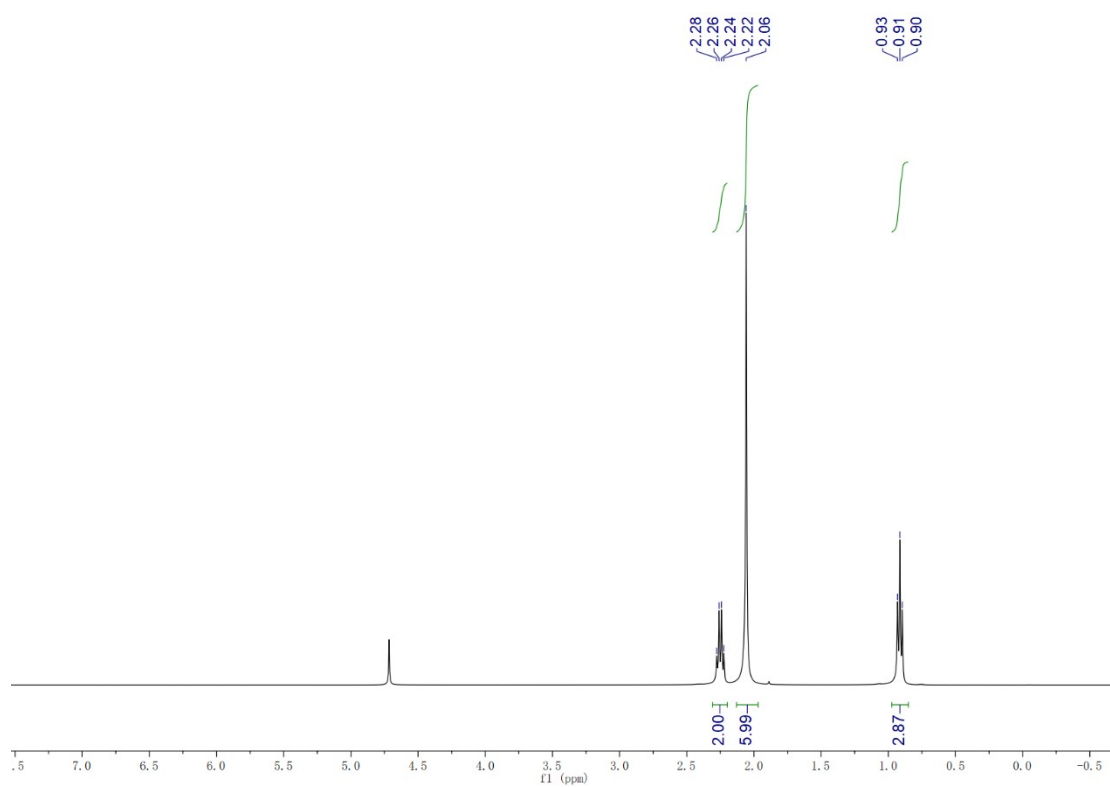

Figure S3.2.1  $^1\text{H}$  NMR of compound **6b** in  $\text{D}_2\text{O}$

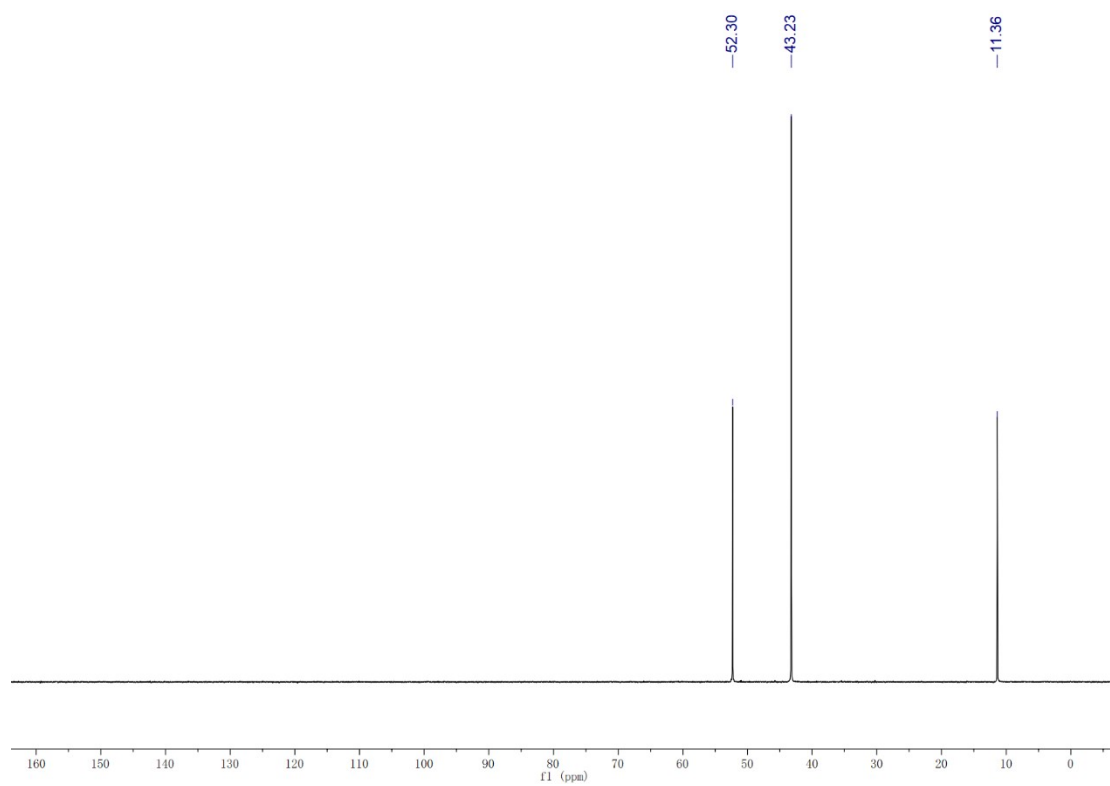

Figure S3.2.2  $^{13}\text{C}$  NMR of compound **6b** in  $\text{D}_2\text{O}$



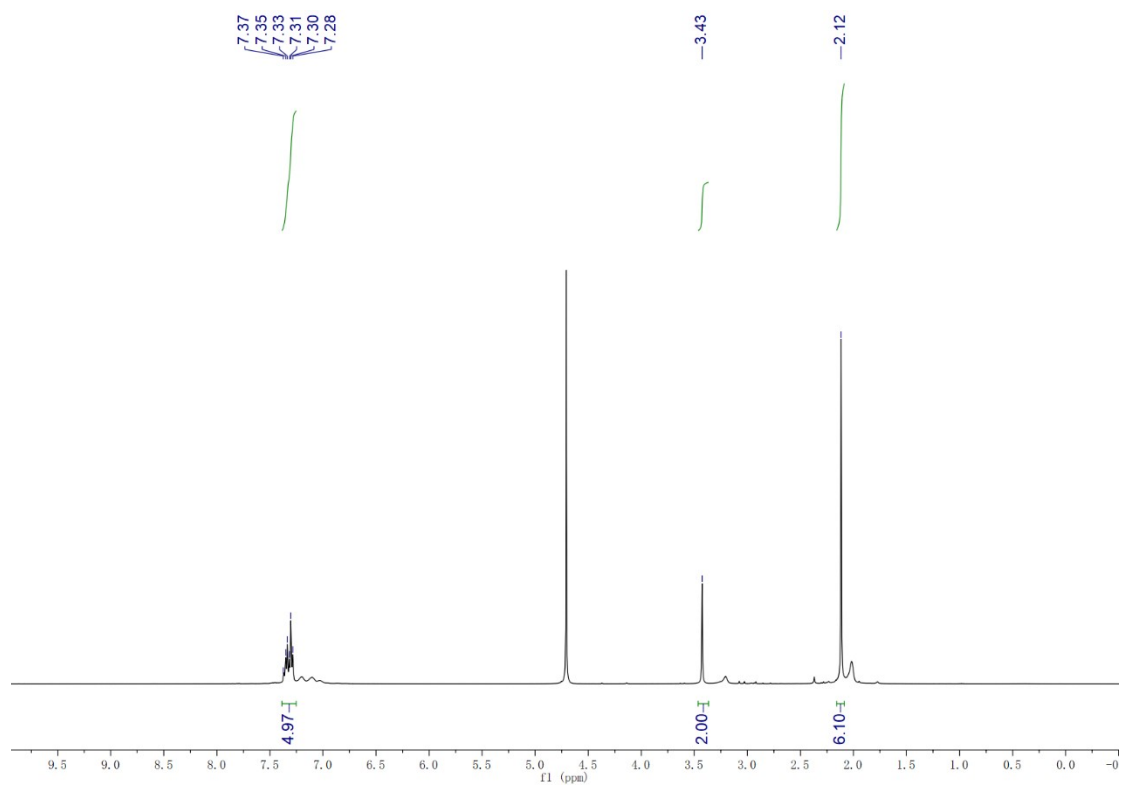

Figure S3.3.1  $^1\text{H}$  NMR of compound **6c** in  $\text{D}_2\text{O}$

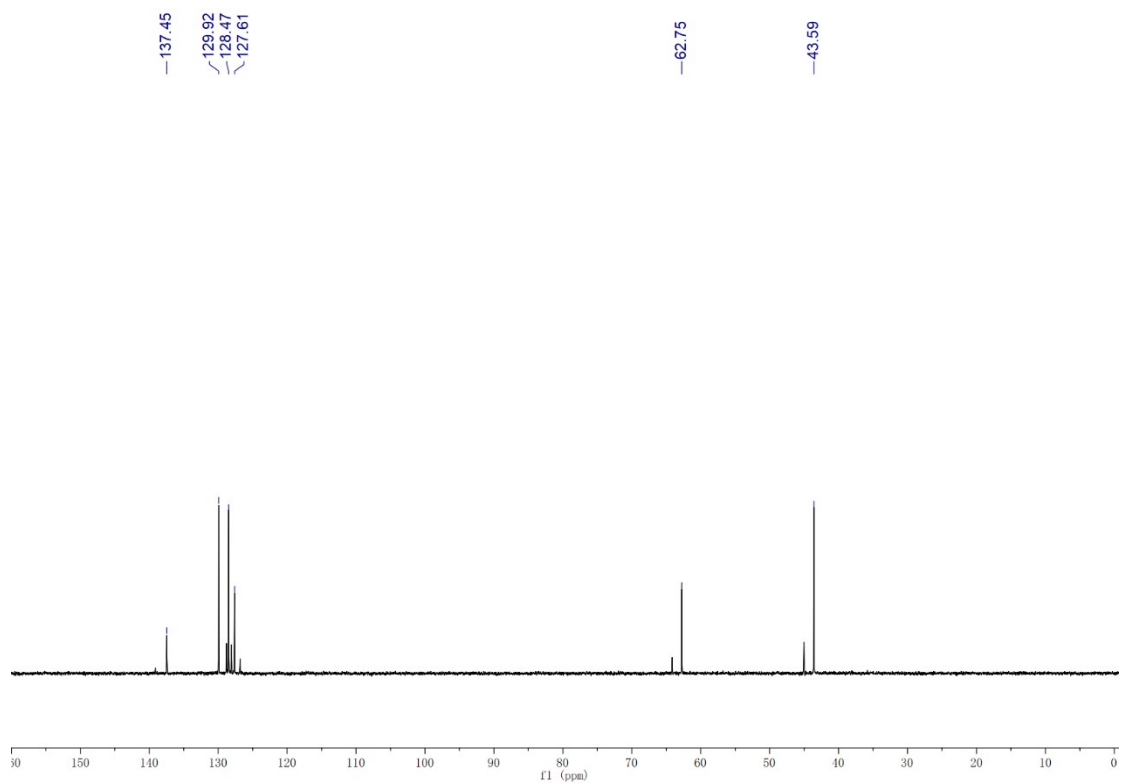

Figure S3.3.2  $^{13}\text{C}$  NMR of compound **6c** in  $\text{D}_2\text{O}$

## References

- [S1] D. Peng, M. Zhang, Z. Huang, *Chem. Eur. J.*, 2015, **21**(42), 14737-14741.  
[S2] P. V. Ramachandran and D. Biswas, *Org. Lett.*, 2007, **9**, 3025-3027.
